# Supplementary material for: Relevance of CSF, Serum and Neuroimaging Markers in CNS and PNS Manifestation in COVID-19: A Systematic Review of Case Report and Case Series
Source: MDPI journal article supplement (doi:10.3390/brainsci11101354), 2021-10-14
Supplement: s1 [file s1]

**Table S1.** Studies with data from case reports and case series on COVID-19 associated CNS manifestation.

| Author/<br>country                   | Age<br>/gender | Onset<br>COVID<br>-19 to<br>Neurolo<br>gical<br>symp-<br>tom<br>onset | Co-<br>morbidity  | Neurological<br>presentation                                                                                                     | CSF findings                                                                                      | Oligo-<br>clonal<br>bands | Se-<br>rum/CSF<br>AQP4,<br>and<br>MOG<br>Ab and<br>other<br>ABs | CT findings                                                                                                                                                                                                                                     | MRI findings                                                                                                                                  | Diagnosis                                   | Manage-<br>ment                                                 | Outcomes | Severity        |
|--------------------------------------|----------------|-----------------------------------------------------------------------|-------------------|----------------------------------------------------------------------------------------------------------------------------------|---------------------------------------------------------------------------------------------------|---------------------------|-----------------------------------------------------------------|-------------------------------------------------------------------------------------------------------------------------------------------------------------------------------------------------------------------------------------------------|-----------------------------------------------------------------------------------------------------------------------------------------------|---------------------------------------------|-----------------------------------------------------------------|----------|-----------------|
| D.D. Caval-<br>canti et. al./<br>USA | 41/F           | NA                                                                    | None              | Confusion,<br>global apha-<br>sia, left gaze<br>preference<br>with NIHSS<br>16, extensor<br>posturing to<br>noxious stim-<br>uli | WBC-41/mm <sup>3</sup><br>neutrophil<br>84%<br>Protein: 616<br>mg/dl<br>Glucose: nor-<br>mal; *** | NA                        | NA                                                              | CT head: venous<br>infarction in the<br>left basal ganglia,<br>thalamus, and<br>mesial temporal<br>lobe with<br>hemorrhagic<br>transformation,<br>intraventricular<br>hemorrhage.<br>CT venogram- oc-<br>clusion of internal<br>cerebral veins. | NA                                                                                                                                            | Venous si-<br>nus throm-<br>bosis<br>stroke | EVD, Hepa-<br>rin infusion<br>without bo-<br>lus treat-<br>ment | Deceased | Severe          |
| Scullen T.<br>et. al./ USA           | 63/F           | 10 days                                                               | HTN, Obe-<br>sity | Altered men-<br>tal status<br>without focal<br>deficit                                                                           | WBC<5/mm <sup>3</sup><br>Protein: nor-<br>mal<br>Glucose: nor-<br>mal, ***                        | NA                        | NA                                                              | Hypodensities<br>within bilateral<br>globus<br>pallidi as well as a<br>focal parenchy-<br>mal hemorrhage<br>in the left occipi-<br>tal pole                                                                                                     | FLAIR changes at<br>the same locations<br>and diffusion re-<br>striction in bilateral<br>globus pallidi and<br>bilateral centrum<br>semiovale | Encephalo-<br>pathy                         | NA                                                              | NA       | Severe          |
| Zoghi A. et.<br>al./ Iran            | 21/M           | 14 Days                                                               | None              | Paresis in<br>lower limbs,                                                                                                       | WBC- 150<br>/mm <sup>3</sup> (60%                                                                 | Neg                       | Neg                                                             | NA                                                                                                                                                                                                                                              | MRI of the cervical<br>and thoracic spine                                                                                                     | ADEM and<br>LETM                            | PLEX x 5<br>days,                                               | Improved | Non-se-<br>vere |

|                             |      |         |                  |                                                              |                                                       |                                                                                                                  |          |    |              |                                                                                                                                                                                                                                        |                                   |                                                     |          |              |
|-----------------------------|------|---------|------------------|--------------------------------------------------------------|-------------------------------------------------------|------------------------------------------------------------------------------------------------------------------|----------|----|--------------|----------------------------------------------------------------------------------------------------------------------------------------------------------------------------------------------------------------------------------------|-----------------------------------|-----------------------------------------------------|----------|--------------|
|                             |      |         |                  |                                                              | paresthesia in lower limbs, urinary retention, drowsy | lymphocytes). Protein 281mg/dl<br>Glucose: 34mg/dl, serum glucose 110 mg/dl<br>SARS-CoV-2 PCR: neg               |          |    |              | LETM with an > 3 segments in the spinal cord.<br>Brain MRI showed bilateral long corticospinal tract lesions in internal capsules extending to the cerebral peduncles and pons. Hyperintensity in the splenium of the corpus callosum. |                                   | Empiric Tx with vancomycin, meropenem and Acyclovir |          |              |
| Guenne L.L. et. al./ France | 69/M | 5 Days  | DM, HTN, seizure | Status epilepticus                                           |                                                       | WBC < 5/mm <sup>3</sup><br>Protein: 66mg/dl<br>Glucose: 105mg/dl, serum glucose 360 mg/dl<br>SARS-CoV-2 PCR: neg | NA       | NA | Unremarkable | Hyperintensity of the right orbital prefrontal cortex adjacent to the olfactory bulb, which seemed to spread toward the right mesial prefrontal cortex and to the right caudate nucleus                                                | Non-convulsive status epilepticus | IVIG                                                | Improved | Severe,      |
| Cani I. et. al./ Italy      | 77/F | 18 Days | None             | Impaired consciousness, stimulus induced myoclonus, positive |                                                       | WBC < 5/mm <sup>3</sup><br>Protein: 56mg/dl<br>Glucose: **, ***                                                  | Negative | NA | NA           | Diffuse white-matter lesions consistent with chronic small vessel disease                                                                                                                                                              | Encephalopathy                    | IVMP x 60mg x 10 days                               | Improved | Non - severe |

|                                |      |        |                        |                                                                    |                                                                                                                                                                    |    |    |    |                                                                                                                                                                                                                                                                                                                              |                                                    |                                                                 |          |        |
|--------------------------------|------|--------|------------------------|--------------------------------------------------------------------|--------------------------------------------------------------------------------------------------------------------------------------------------------------------|----|----|----|------------------------------------------------------------------------------------------------------------------------------------------------------------------------------------------------------------------------------------------------------------------------------------------------------------------------------|----------------------------------------------------|-----------------------------------------------------------------|----------|--------|
|                                |      |        |                        | primitive re-<br>flexes                                            | SARS-CoV-2<br>PCR: neg                                                                                                                                             |    |    |    | without contrast en-<br>hancement                                                                                                                                                                                                                                                                                            |                                                    |                                                                 |          |        |
| Benameur<br>K. et. al./<br>USA | 31/F | 5 Days | Sickle cell<br>disease | Altered men-<br>tation                                             | WBC: 115/<br>mm <sup>3</sup><br>51% Neutro-<br>phils,<br>Protein:<br>>200mg/dl<br>Glucose: 40<br>mg/dl; ***<br>SARS-CoV-2<br>PCR: neg<br>SARS-CoV-2<br>CSF IgM pos | NA | NA | NA | Occlusive thrombus<br>in the<br>right internal ca-<br>rotid artery with as-<br>sociated restricted<br>diffusion on DWI<br>and edema on<br>T2/FLAIR in the<br>right cerebral hemi-<br>sphere consistent<br>with infarct. Foci of<br>T2 signal abnormal-<br>ity were also identi-<br>fied within the cer-<br>vical spinal cord | Acute in-<br>farct, En-<br>cephalitis,<br>Myelitis | Hy-<br>droxychloro-<br>quine and<br>Peramivir<br>100mg<br>Daily | Deceased | Severe |
| Benameur<br>K. et. al./<br>USA | 34/M | 9 Days | HTN                    | Profound en-<br>cephalopa-<br>thy, multifo-<br>cal myoclo-<br>nus. | WBC: 1/mm <sup>3</sup><br>Protein: 37<br>mg/dl<br>Glucose:<br>111mg/dl; ***<br>SARS-CoV-2<br>PCR: neg<br>SARS-CoV-2<br>CSF IgM pos                                 | NA | NA | NA | Non-enhancing hy-<br>perintense<br>lesion within the<br>splenium of the cor-<br>pus callosum<br>on FLAI and DWI                                                                                                                                                                                                              | Encephalo-<br>pathy                                | NA                                                              | NA       | Severe |

|                                |      |    |      |                                                                |                                                                                                                                         |      |    |    |                                                                                                                                                                                                              |                          |                                                                                                                           |          |        |
|--------------------------------|------|----|------|----------------------------------------------------------------|-----------------------------------------------------------------------------------------------------------------------------------------|------|----|----|--------------------------------------------------------------------------------------------------------------------------------------------------------------------------------------------------------------|--------------------------|---------------------------------------------------------------------------------------------------------------------------|----------|--------|
| Benameur<br>K. et. al./<br>USA | 64/M | NA | HTN  | Profound en-<br>cephalopa-<br>thy,<br>multifocal<br>myoclonus. | WBC < 5/<br>mm <sup>3</sup><br>Protein:<br>21mg/dl Glu-<br>cose: 88mg/dl,<br>***<br>SARS-CoV-2<br>PCR: neg<br>SARS-CoV-2<br>CSF IgM pos | NA   | NA | NA | Hyperintense area<br>in the right tem-<br>poral lobe                                                                                                                                                         | Encephalo-<br>pathy      | NA                                                                                                                        | Improved | Severe |
| Dogan L. et.<br>al./ Italy     | 49/M | NA | None | NA                                                             | WBC: 0<br>Protein:<br>37.6mg/dl<br>Glucose:<br>130mg/dl; ***<br>SARS-CoV-2<br>PCR: neg                                                  | NA   | NA | NA | Bilateral frontal cor-<br>tical hyperintensity<br>together with focal<br>effacement of<br>right frontal sulci.<br>DWI showed<br>frontal cortical hy-<br>perintensity and<br>leptomeningeal en-<br>hancement. | Meningoen-<br>cephalitis | Lop-<br>inavir/Ri-<br>tonavir,<br>Azithromy-<br>cin, Hy-<br>droxychlo-<br>roquine,<br>Favipiravir<br>PLEX x 6 cy-<br>cles | Improved | Severe |
| Dogan L. et.<br>al./ Italy     | 59/M | NA | HTN  | NA                                                             | WBC: 0,<br>Protein:<br>73.2mg/dl<br>Glucose:<br>201mg/dl; ***<br>SARS-CoV-2<br>PCR: neg                                                 | None | NA | NA | MRI bilateral exten-<br>sive<br>hyperintensity<br>frontal and<br>parietal white mat-<br>ter. DWI images<br>showed matching<br>areas restrictions<br>and leptomeningeal<br>enhancement                        | Meningoen-<br>cephalitis | Azithromy-<br>cin, Hy-<br>droxychlo-<br>roquine,<br>Favipiravir<br>PLEX x 9 cy-<br>cles                                   | Improved | Severe |

|                               |      |        |                  |                                            |                                                                               |         |    |                                                        |                                                                                           |                          |                                                                                     |                                                                         |        |
|-------------------------------|------|--------|------------------|--------------------------------------------|-------------------------------------------------------------------------------|---------|----|--------------------------------------------------------|-------------------------------------------------------------------------------------------|--------------------------|-------------------------------------------------------------------------------------|-------------------------------------------------------------------------|--------|
| Dogan L. et. al./ Italy       | 59/M | NA     | HTN, DM, Obesity | NA                                         | WBC: 0<br>Protein: 65.7mg/dl<br>Glucose: 121mg/dl; ***<br>SARS-CoV-2 PCR: neg | None    | NA | NA                                                     | Normal                                                                                    | Meningoen-<br>cephalitis | Azithromy-<br>cin, Hy-<br>droxychloro-<br>quine, Favipiravir<br>PLEX x 1 cycle      | Deceased                                                                | Severe |
| Dogan L. et. al./ Italy       | 51/F | NA     | HT, DM           | NA                                         | WBC: 0<br>Protein: 131mg/dl<br>Glucose: 120 mg/dl; ***<br>SARS-CoV-2 PCR: neg | None    | NA | NA                                                     | Normal                                                                                    | Meningoen-<br>cephalitis | Azithromy-<br>cin, Favipiravir<br>PLEX x 5 cycles                                   | Patient re-<br>gained con-<br>sciousness<br>after 1 <sup>st</sup> cycle | Severe |
| Dogan L. et. al./ Italy       | 55/M | NA     | HTN              | NA                                         | WBC: 0<br>Protein: 52mg/dl<br>Glucose: 67mg/dl; ***<br>SARS-CoV-2 PCR: neg    | None    | NA | NA                                                     | Normal                                                                                    | Meningoen-<br>cephalitis | Azithromy-<br>cin, Hy-<br>droxychloro-<br>quine, Favipiravir<br><br>PLEX x 5 cycles | NA                                                                      | Severe |
| Dogan L. et. al./ Italy       | 22/M | NA     | Autism           | NA                                         | WBC: 0<br>Protein: 57mg/dl<br>Glucose: 59mg/dl; ***                           | None    | NA | NA                                                     | NA                                                                                        | Meningoen-<br>cephalitis | AZI, HC,<br>FAV<br>PLEX x 3 cycles                                                  | NA                                                                      | Severe |
| Virhammar J. et. al. / Sweden | 55/F | 7 Days | NA               | Lethargic, stuporous, Multifocal Myoclonus | WBC: <5/mm <sup>3</sup><br>Protein: Normal<br>Glucose: **; ***                | present | NA | Symmetrical hypodensities in the thalami. and midbrain | MRI hyperintensity in subinsular regions, medial temporal lobes, hippocampi, and cerebral | AHNE                     | IVIG followed by PLEX                                                               | Improved                                                                | Severe |

|                                   |      |        |                                                                   |                                                                                                                                                |                                                                                                           |        |                           |    |                                                                                                                                                                                        |                                                                                                                        |                                                                                                  |           |                 |  |
|-----------------------------------|------|--------|-------------------------------------------------------------------|------------------------------------------------------------------------------------------------------------------------------------------------|-----------------------------------------------------------------------------------------------------------|--------|---------------------------|----|----------------------------------------------------------------------------------------------------------------------------------------------------------------------------------------|------------------------------------------------------------------------------------------------------------------------|--------------------------------------------------------------------------------------------------|-----------|-----------------|--|
|                                   |      |        |                                                                   |                                                                                                                                                | SARS-CoV-2<br>PCR: pos<br>SARS-CoV-2<br>CSF IgG                                                           |        |                           |    |                                                                                                                                                                                        | peduncle, pons and<br>SWI small foci of<br>petechial hemor-<br>rhage in central<br>thalami and subin-<br>sular regions |                                                                                                  |           |                 |  |
| Farhadian S.<br>et. al./ USA      | 78/F | NA     | Immunocom-<br>promised, re-<br>nal trans-<br>planted pa-<br>tient | Altered men-<br>tal state, bi-<br>lateral tremor<br>of upper and<br>lower ex-<br>tremity                                                       | WBC < 5/<br>mm <sup>3</sup><br>Protein:<br>43mg/dl<br>Glucose: **,<br>***<br>SARS-CoV-2<br>PCR: neg       | None   | None                      | NA | Atrophy and<br>patchy periventric-<br>ular and subcortical<br>white matter<br>hyperintensities,<br>which were inter-<br>preted as sequelae<br>of<br>small vessel is-<br>chemic disease | Encephalo-<br>pathy                                                                                                    | Hy-<br>droxychloro-<br>quine,<br>tocilizumab                                                     | Improved  | Non-se-<br>vere |  |
| Pinto A.A.<br>et. al./ USA        | 44/F | 7 Days | NA                                                                | Mild expres-<br>sive and re-<br>ceptive apha-<br>sia, visual<br>and sensory<br>inattention,<br>paresis in<br>right upper<br>and lower<br>limbs | WBC -<br>13/mm <sup>3</sup><br>Protein:<br>50.7mg/dl<br>Glucose<br>29mg/dl, ***<br>SARS-CoV-2<br>PCR: neg | Absent | Anti-<br>MOG:<br>positive | NA | T2-hyperintensity<br>in periventricular,<br>along the left tem-<br>poral and occipital<br>horns and into the<br>subcortical deep<br>white matter                                       | Anti-MOG<br>syndrome                                                                                                   | IVMP 1g x 5<br>days fol-<br>lowed by<br>oral predni-<br>solone 60mg<br>daily. PLEX<br>x 5 cycles | Improved. | Non-Se-<br>vere |  |
| Espíndola<br>OM et.al.<br>/Brazil | NA   | NA     | NA                                                                | NA                                                                                                                                             | WBC-<br>18/mm3, pro-<br>tein: 60 mg/dl,<br>glucose: 43,<br>***                                            | NA     | NA                        | NA | NA                                                                                                                                                                                     | Encephalitis                                                                                                           | NA                                                                                               | NA        | NA              |  |

|                                    |      |         |                                |                                    |                                                                                                     |    |    |                             |    |                     |                                                                        |          |                 |
|------------------------------------|------|---------|--------------------------------|------------------------------------|-----------------------------------------------------------------------------------------------------|----|----|-----------------------------|----|---------------------|------------------------------------------------------------------------|----------|-----------------|
|                                    |      |         |                                |                                    | SARS-CoV-2<br>PCR: neg                                                                              |    |    |                             |    |                     |                                                                        |          |                 |
| Espíndola<br>OM et.al.<br>/Brazil  | NA   | NA      | NA                             | NA                                 | WBC- 2/mm3,<br>Protein: 23<br>mg/dl, Glu-<br>cose: 96, ***<br>SARS-CoV-2<br>PCR: neg                | NA | NA | NA                          | NA | Encephalitis        | NA                                                                     | NA       | NA              |
| Espíndola<br>OM et.al.<br>/Brazil  | NA   | NA      | NA                             | NA                                 | WBC- 3/mm3,<br>Protein: 51<br>mg/dl, Glu-<br>cose: 115, ***<br>SARS-CoV-2<br>PCR: neg               | NA | NA | NA                          | NA | Delirium            | NA                                                                     | NA       | NA              |
| Espíndola<br>OM et.al.<br>/Brazil  | NA   | NA      | NA                             | NA                                 | WBC- 3/mm3,<br>Protein: 51<br>mg/dl, Glu-<br>cose: 115, ***<br>SARS-CoV-2<br>PCR: neg               | NA | NA | NA                          | NA | Delirium            | NA                                                                     | NA       | NA              |
| Mingxiang<br>Ye. et. al./<br>China | NA/M | 13 Days | NA                             | Confusion,<br>nuchal rigid-<br>ity | WBC <5mm <sup>3</sup><br>Protein:<br>27mg/dl<br>Glucose:<br>314mg/dl; ***<br>SARS-CoV-2<br>PCR: neg | NA | NA | Normal                      | NA | Encephalitis        | Supportive<br>treatment<br>only includ-<br>ing Manni-<br>tol infusion. | Improved | Non-se-<br>vere |
| Filatov A.<br>et. al./ USA         | 74/M | 1 Day   | Atrial fibril-<br>lation, CVA, | Headache, al-<br>tered mental      | WBC < 5mm <sup>3</sup>                                                                              | NA | NA | Normal except an<br>area of | NA | Encephalo-<br>pathy | Vancomy-<br>cin,                                                       | NA       | Severe          |

|                               |       |         |    |                                              |                                                                                                               |                                                                                       |              |                                                                       |        |        |                |                                              |                                                                             |            |  |
|-------------------------------|-------|---------|----|----------------------------------------------|---------------------------------------------------------------------------------------------------------------|---------------------------------------------------------------------------------------|--------------|-----------------------------------------------------------------------|--------|--------|----------------|----------------------------------------------|-----------------------------------------------------------------------------|------------|--|
|                               |       |         |    | Parkinson's disease, COPD, recent cellulitis | status, aphasic, apraxia                                                                                      | Protein: 68mg/dl<br>Glucose: 75mg/dl; ***                                             |              | encephalomalacia in left temporal region consistent with prior stroke |        |        |                |                                              | Mero-penem, acyclovir along with hydroxychloroquine and lopinavir/ritonavir |            |  |
| Guilmot A. et. al. /Belgium   | 80/NA | NA      | NA |                                              | Paroxysmal dysarthria, tonic-clonic seizure, visual hallucinations, short term memory disturbance and anxiety | WBC > 5mm <sup>3</sup><br>Protein: 46mg/dl<br>Glucose: **; ***<br>SARS-CoV-2 PCR: neg | Positive OCB | anti-Caspr2 IgG antibodies in serum and in CSF                        | NA     | Normal | Encephalitis   | IVMP followed by PLEX (unspecified duration) | Improved                                                                    | Non-severe |  |
| Guilmot A. /et. al. / Belgium | 62/NA | 16 Days |    | NA                                           | Aggressiveness, paranoia, temporal status epilepticus                                                         | WBC < 5mm <sup>3</sup><br>Protein: 51mg/dl<br>Glucose: **; ***<br>SARS-CoV-2 PCR: neg | Mirror       | NA                                                                    | Normal | NA     | Encephalopathy | NA                                           | NA                                                                          | Severe     |  |
| Guilmot A. /et. al. / Belgium | 71/NA | 5 Days  |    | NA                                           | Delirium, with akathisia, choreiform involuntary movement of upper limbs and gait ataxia.                     | WBC < 5mm <sup>3</sup><br>Protein: 32mg/dl<br>Glucose: **; ***<br>SARS-CoV-2 PCR: neg | Negative     | Anti-GD1b IgG-high titre                                              | Normal | NA     | Encephalopathy | NA                                           | NA                                                                          | Non-severe |  |



|                                     |         |                                   |                         |                                                                                                |               |     |        |    |                                       |    |    |                 |
|-------------------------------------|---------|-----------------------------------|-------------------------|------------------------------------------------------------------------------------------------|---------------|-----|--------|----|---------------------------------------|----|----|-----------------|
| Guilmot A.<br>/et. al. / Bel- 60/NA | 7 Days  | NA                                | Delirium                | WBC < 5mm <sup>3</sup><br>Protein:<br>35mg/dl<br>Glucose: **<br>;***<br>SARS-CoV-2<br>PCR: neg | Nega-<br>tive | Neg | Normal | NA | Encephalo-<br>pathy                   | NA | NA | Severe          |
| Guilmot A.<br>/et. al. / Bel- 66/NA | 5 Days  | NA                                | Delirium                | WBC < 5mm <sup>3</sup><br>Protein:<br>18mg/dl<br>Glucose: **;<br>***<br>SARS-CoV-2<br>PCR: neg | Mirror        | NA  | Normal | NA | Encephalo-<br>pathy                   | NA | NA | Severe          |
| Guilmot A.<br>/et. al. / Bel- 58/NA | 21 Days | Intracardiac<br>thrombus          | Stroke like<br>symptoms | WBC < 5mm <sup>3</sup><br>Protein:<br>52mg/dl<br>Glucose: **;<br>***<br>SARS-CoV-2<br>PCR: neg | NA            | NA  | NA     | NA | Acute cere-<br>brovascular<br>disease | NA | NA | Severe          |
| Guilmot A.<br>/et. al. / Bel- 74/NA | NA      | Patent fora-<br>men ovale,<br>DVT | Stroke like<br>symptoms | WBC < 5mm <sup>3</sup><br>Protein:<br>51mg/dl<br>Glucose: **;<br>***<br>SARS-CoV-2<br>PCR: neg | Mirror        | NA  | NA     | NA | Acute cere-<br>brovascular<br>disease | NA | NA | Non-se-<br>vere |

|                                       |       |        |                        |                                                                           |                                                                                                 |               |    |                                                 |                                                                                                                                                                                                                                                                 |                                                         |                                                                                                                   |                       |        |
|---------------------------------------|-------|--------|------------------------|---------------------------------------------------------------------------|-------------------------------------------------------------------------------------------------|---------------|----|-------------------------------------------------|-----------------------------------------------------------------------------------------------------------------------------------------------------------------------------------------------------------------------------------------------------------------|---------------------------------------------------------|-------------------------------------------------------------------------------------------------------------------|-----------------------|--------|
| Guilmot A.<br>/et. al. / Bel-<br>gium | 54/NA | NA     | Pulmonary<br>embolism  | Stroke like<br>symptoms                                                   | WBC < 5mm <sup>3</sup><br>Protein:<br>11mg/dl<br>Glucose: **;<br>***<br>SARS-CoV-2<br>PCR: neg  | Nega-<br>tive | NA | NA                                              | NA                                                                                                                                                                                                                                                              | Acute cere-<br>brovascular<br>disease                   | NA                                                                                                                | NA                    | Severe |
| Krett, J.D.<br>et. al./ Can-<br>ada   | 69/M  | 4 Days | CAD, HTN,<br>DM type 2 | Unrespon-<br>sive and dif-<br>fusely pa-<br>retic.                        | WBC<5mm <sup>3</sup><br>Protein: >45<br>mg/dl,<br>Glucose: **,<br>***<br>SARS-CoV-2<br>PCR: neg | NA            | NA | Unremarkable                                    | MRI: showed multi-<br>compartmental<br>hemorrhages with<br>mild surrounding<br>vasogenic edema<br>and no abnormal<br>enhancement. MRI<br>spine: unremarka-<br>ble                                                                                               | ANE                                                     | Hy-<br>droxychloro-<br>quine x 7<br>days                                                                          | Partially<br>improved | Severe |
| Moriguchi<br>T. et. al./ Ja-<br>pan   | 24/M  | 9 Days | None                   | Altered con-<br>sciousness,<br>generalized<br>seizure, neck<br>stiffness. | CSF:<br>WBC 12/ mm <sup>3</sup><br>Protein: NA<br>Glucose: **,<br>***<br>SARS-CoV-2<br>PCR: pos | NA            | NA | CT head- normal<br>with no evidence<br>of edema | DWI changes in in-<br>ferior horn of right<br>lateral ventricle.<br>FLAIR hyperinten-<br>sity in<br>the right mesial<br>temporal lobe and<br>hippocampus with<br>slight<br>hippocampal atro-<br>phy. Contrast-en-<br>hanced imaging<br>showed no<br>enhancement | Right lateral<br>ventriculitis<br>and En-<br>cephalitis | Ceftriaxone,<br>vancomy-<br>cin,<br>acyclovir,<br>Favipiravir<br>and ster-<br>oids. Kep-<br>pra for sei-<br>zure. | NA                    | Severe |

|                            |      |    |    |                                                              |                                                                         |          |                  |                                                                                                                                                                                 |                             |                         |                         |    |    |    |
|----------------------------|------|----|----|--------------------------------------------------------------|-------------------------------------------------------------------------|----------|------------------|---------------------------------------------------------------------------------------------------------------------------------------------------------------------------------|-----------------------------|-------------------------|-------------------------|----|----|----|
| Franke C. et. al./ Germany | 76/M | NA | NA | Downbeat nystagmus, generalized stimulus-sensitive myoclonus | WBC: 1/ mm <sup>3</sup><br>Protein: 31.4mg/dl<br>Glucose:76mg/dl; ***   | Positive | Neg              | NA                                                                                                                                                                              | Normal                      | Autoimmune encephalitis | NA                      | NA | NA |    |
| Franke C. et. al./ Germany | 58/F | NA | NA | Delirium                                                     | WBC: 5mm <sup>3</sup><br>Protein: 36.8mg/dl<br>Glucose:93mg/dl; ***     | Positive | Neg              | NA                                                                                                                                                                              | Normal                      | Autoimmune encephalitis | NA                      | NA | NA |    |
| Franke C. et. al./ Germany | 76/M | NA | NA | Right-sided stimulus-sensitive myoclonus                     | WBC: 177/mm <sup>3</sup><br>Protein: 93.7mg/dl<br>Glucose:83mg/dl; ***  | Positive | Neg              | NA                                                                                                                                                                              | Normal                      | Autoimmune encephalitis | NA                      | NA | NA |    |
| Franke C. et. al./ Germany | 58/F | NA | NA | Right-sided orofacial myoclonus                              | WBC: 17/mm <sup>3</sup><br>Protein: 28.1 mg/dl<br>Glucose: 52mg/dl, *** | Negative | Anti-Yo positive | PET-CT showed evidence of florid encephalitis with tracer increase in the basal ganglia and limbic system as well as in the cerebellar region of the inferior cerebellar artery |                             | Normal                  | Autoimmune encephalitis | NA | NA | NA |
| Franke C. et. al./ Germany | 54/M | NA | NA | Delirium, myoclonus, epileptic seizures                      | WBC<5mm <sup>3</sup><br>Protein: 25.6mg/dl                              | NA       | Neg              | NA                                                                                                                                                                              | Marked edema of the fornix. | Autoimmune encephalitis | NA                      | NA | NA |    |

|                               |      |    |    |                                                                                            |                                                                                |               |          |    |                                                                                             |                                                |    |    |    |    |
|-------------------------------|------|----|----|--------------------------------------------------------------------------------------------|--------------------------------------------------------------------------------|---------------|----------|----|---------------------------------------------------------------------------------------------|------------------------------------------------|----|----|----|----|
| Glucose:<br>75mg/dl; ***      |      |    |    |                                                                                            |                                                                                |               |          |    |                                                                                             |                                                |    |    |    |    |
| Franke C. et.<br>al./ Germany | 77/M | NA | NA | Right-sided<br>faciobrachial<br>myoclonus,                                                 | WBC<5mm <sup>3</sup><br>Pro-<br>tein:68.2mg/dl<br>Glucose:<br>145mg/dl;***     | Positive      | Negative | NA | Ischemic lesion<br>(DWI) changes of<br>the right middle<br>cerebral artery<br>(MCA) region. | Autoim-<br>mune en-<br>cephali-<br>tis,infarct | NA | NA | NA | NA |
| Franke C. et.<br>al./ Germany | 48/M | NA | NA | Oculomotor<br>paresis,<br>transient<br>generalized<br>myoclonus,<br>prolonged<br>awakening | WBC<5/mm <sup>3</sup><br>Protein:<br>74.1mg/dl<br>Glu-<br>cose:80mg/dl;<br>*** | Nega-<br>tive | Negative | NA | Normal                                                                                      | Autoim-<br>mune en-<br>cephalitis              | NA | NA | NA | NA |
| Franke C. et.<br>al./ Germany | 78/M | NA | NA | Dystonia<br>right<br>> left upper<br>limb, delir-<br>ium                                   | WBC<5/mm <sup>3</sup><br>Pro-<br>tein:437m/dl<br>Glucose:<br>94mg/dl; ***      | NA            | Negative | NA | Normal                                                                                      | Autoim-<br>mune en-<br>cephalitis              | NA | NA | NA | NA |
| Franke C. et.<br>al./ Germany | 75/F | NA | NA | Aphasia,<br>neglect,<br>encephalopa-<br>thy<br>, stupor,<br>impaired<br>conscious-<br>ness | WBC<5mm <sup>3</sup><br>Pro-<br>tein:16.8mg/dl<br>Glucose: **;<br>***          | Nega-<br>tive | Negative | NA | Normal                                                                                      | Autoim-<br>mune en-<br>cephalitis              | NA | NA | NA | NA |
| Franke C. et.<br>al./ Germany | 69/M | NA | NA | Downbeat<br>nystagmus,<br>orofacial my-<br>oclonus, de-<br>lirium                          | WBC: 8/ mm <sup>3</sup><br>Protein:<br>59.4mg/dl<br>Glucose:<br>123mg/dl       | Positive      | Negative | NA | Normal                                                                                      | NA                                             | NA | NA | NA | NA |

|                                   |       |         |              |                                                                                                                                              |                                                                                                                        |        |                                |    |                                                                                                                                                                           |                    |                                                                              |                     |            |
|-----------------------------------|-------|---------|--------------|----------------------------------------------------------------------------------------------------------------------------------------------|------------------------------------------------------------------------------------------------------------------------|--------|--------------------------------|----|---------------------------------------------------------------------------------------------------------------------------------------------------------------------------|--------------------|------------------------------------------------------------------------------|---------------------|------------|
| Fadakar N.<br>et. al./ Iran       | 47/M  | 10 Days | Unremarkable | Vertigo,<br>headache,<br>mild dysarthria, wide<br>based ataxic<br>gait, head titubation, mild<br>truncal swaying, nystagmus                  | WBC:<br>10mm <sup>3</sup> , 60%<br>lymphocytes<br>Protein:58mg/dl<br>Glucose:60mg/dl;<br>***<br>SARS-CoV-2<br>PCR: pos | Neg    | Neg                            | NA | Bilateral cerebellar<br>hemispheres as well<br>as vermis hyperintensities and edema<br>with<br>cortical-meningeal<br>enhancement of cerebellum on post<br>contrast images | Acute Cerebellitis | Lopinavir/ritonavir administered<br>400/100 mg<br>twice daily<br>for 14 days | Improved            | Non-severe |
| Guilmot A.<br>/et. al. / Bel-gium | 62/NA | 21 Days | NA           | Ophthalmoplegia,<br>palatal myoclonus, neck<br>stiffness and areflexic flaccid tetraplegia, coma                                             | WBC<5mm <sup>3</sup><br>Protein:32mg/dl<br>Glucose: **;<br>***<br>SARS-CoV-2<br>PCR: neg                               | Mirror | Anti-GD1b<br>IgG high<br>titer | NA | Unremarkable                                                                                                                                                              | Encephalopathy     | IVIG                                                                         | Partial improvement | Severe     |
| GuilmotA.<br>/et. al./ Bel-gium   | 66/NA | 21 Days | NA           | Delirium, agitation, hallucination,<br>neck stiffness, diffuse<br>myoclonus, bilateral ophthalmoplegia, palatal<br>tremor, apnea and<br>coma | WBC<5mm <sup>3</sup><br>Protein:<br>45mg/dl<br>Glucose: **;<br>***<br>SARS-CoV-2<br>PCR: neg                           | Neg    | Neg                            | NA | Unremarkable                                                                                                                                                              | Encephalopathy     | IVIG                                                                         | Improving           | Severe     |

|                                      |       |         |                                                                                                       |                                                                                                                      |                                                                                                   |               |          |        |                                                                                                                                                                 |                                   |                                                       |           |                 |
|--------------------------------------|-------|---------|-------------------------------------------------------------------------------------------------------|----------------------------------------------------------------------------------------------------------------------|---------------------------------------------------------------------------------------------------|---------------|----------|--------|-----------------------------------------------------------------------------------------------------------------------------------------------------------------|-----------------------------------|-------------------------------------------------------|-----------|-----------------|
| Guilmot A.<br>/et. al./ Bel-<br>gium | 54/NA | 5 Days  | NA                                                                                                    | Behavioral<br>changes, irri-<br>tability, para-<br>noia.                                                             | WBC<5/mm <sup>3</sup><br>Protein:<br>18mg/dl<br>Glucose: **;<br>***                               | Mirror        | Neg      | NA     | NA                                                                                                                                                              | Encephalo-<br>pathy               | NA                                                    | NA        | Non-se-<br>vere |
| Domingues<br>R.B. et. al./<br>Brazil | 42/F  | 21 Days | Paresthesia<br>of left upper<br>limb, later<br>progression<br>to left he-<br>mithorax and<br>hemiface | None                                                                                                                 | WBC<5mm <sup>3</sup><br>Protein:<br>32mg/dl<br>Glucose:<br>62mg/dl; ***<br>SARS-CoV-2<br>PCR: pos | Neg           | Neg      | NA     | Brain MRI normal<br><br>MRI Cervical cord<br>hyperintense lesion<br>spanning multiple<br>levels without<br>enhancement                                          | Transverse<br>Myelitis            | NA                                                    | NA        | Non-se-<br>vere |
| Mawhinney<br>J.A. et. al./<br>UK     | 41/M  | 10 Days | Congenital<br>nystagmus                                                                               | Agitated, se-<br>vere head-<br>ache.                                                                                 | WBC<5mm <sup>3</sup><br>Protein:<br>19mg/dl<br>Glucose:<br>48mg/dl; ***<br>SARS-CoV-2<br>PCR: neg | Neg           | Neg      | Normal | Normal                                                                                                                                                          | NA                                | Antibiotics<br>and acyclo-<br>vir and<br>olanzapine   | Improved  | Severe          |
| Delamarre<br>L. et. al./<br>France   | 51/M  | 21 Days | None                                                                                                  | Coma, right<br>sided 6 <sup>th</sup> cra-<br>nial nerve<br>palsy, rhyth-<br>mic move-<br>ment of right<br>upper limb | WBC<5mm <sup>3</sup><br>Protein: NA<br>Glucose: **;<br>***<br>SARS-CoV-2<br>PCR: neg              | NA            | Negative | Normal | Progressing<br>lesions with diffuse<br>hyperintense le-<br>sions<br><br>in the thalami, cere-<br>bellum, brainstem,<br>supratentorial grey<br>and white matters | AHNE                              | IVMP x 3<br>days fol-<br>lowed by<br>IVIG x 5<br>days | Improved. | Severe          |
| Grimaldi S.<br>et. al./<br>France    | 72/M  | 17 Days | None                                                                                                  | Cerebellar<br>syndrome<br>(tremor,                                                                                   | WBC<5mm <sup>3</sup><br>Protein:<br>49mg/dl                                                       | Nega-<br>tive | Negative | NA     | Normal                                                                                                                                                          | Autoim-<br>mune En-<br>cephalitis | IVIG x 5<br>Days fol-<br>lowed by                     | Improved  | Non-se-<br>vere |

|                              |      |         |                     |                                                                                                         |                                                                                          |                                            |     |                                                                                    |                                                                                                                                                                                                   |                     |                                                   |                    |            |
|------------------------------|------|---------|---------------------|---------------------------------------------------------------------------------------------------------|------------------------------------------------------------------------------------------|--------------------------------------------|-----|------------------------------------------------------------------------------------|---------------------------------------------------------------------------------------------------------------------------------------------------------------------------------------------------|---------------------|---------------------------------------------------|--------------------|------------|
|                              |      |         |                     |                                                                                                         | ataxia, dysarthria)<br>with stimulus-sensitive diffuse myoclonus                         | Glucose: **;<br>***<br>SARS-CoV-2 PCR: neg |     |                                                                                    |                                                                                                                                                                                                   |                     | IVMP x 5 days.                                    |                    |            |
| Zambreanu L. et. al. / UK    | 66/F | 18 Days | None                | Confusion, generalized tonic-clonic seizure                                                             | WBC<5mm <sup>3</sup><br>Protein:100mg/dl<br>Glucose: 35mg/dl; ***<br>SARS-CoV-2 PCR: neg | Negative                                   | Neg | Normal                                                                             | MRI showed symmetrical hyperintensities in mesial temporal lobes and medial thalami and to a lesser extent upper pons, as well as scattered subcortical white matter hyperintensities.            | Limbic encephalitis | IVMP x 3 days followed by IVIG (unspecified time) | Improved           | Non-severe |
| Matos A.R. et. al./ Portugal | 42/M | 7 Days  | None                | Confusion, hypokinesia, apathy, hyposmia, dysexecutive syndrome, perseveration, dysphonia and dysphagia | WBC<5mm <sup>3</sup><br>Protein: 78mg/dl<br>Glucose: **;<br>***<br>SARS-CoV-2 PCR: neg   | NA                                         | NA  | Multiple hypodense lesions involving the white matter, basal ganglia, and thalami. | Multiple hyperintense lesions involving the deep and subcortical white matter on both hemispheres, as well as the thalami, basal ganglia, and basal pons; some showed restricted diffusion on DWI | CNS vasculopathy    | IVIG followed by IVMP x 5 days                    | Improved           | Non-severe |
| Byrnes S. et. al./ USA       | 36/M | 8 Days  | Polysubstance abuse | Slurred speech,                                                                                         | WBC: >5/mm <sup>3</sup>                                                                  | NA                                         | N A | Normal                                                                             | Multiple focal enhancing lesions the                                                                                                                                                              | Encephalopathy      | IVMP followed by                                  | Partially Improved | Non-severe |

|                                        |      |         |              |                                                 |                                                                                          |     |    |                                                                           |                                                                                                                                                                                                                                           |                |                                    |                                       |            |
|----------------------------------------|------|---------|--------------|-------------------------------------------------|------------------------------------------------------------------------------------------|-----|----|---------------------------------------------------------------------------|-------------------------------------------------------------------------------------------------------------------------------------------------------------------------------------------------------------------------------------------|----------------|------------------------------------|---------------------------------------|------------|
|                                        |      |         |              | pinpoint pupils, agitation, choreiform movement | lymphocyte predominance<br>Protein: increased<br>Glucose: **;<br>***                     |     |    |                                                                           | bilateral medial putamen and left cerebellum.<br><br>There were also several cortical and subcortical lesions including the hippocampus, primarily on the left side, along with punctate restricted diffusion in the right basal ganglia. | IVIG x 5 days  |                                    |                                       |            |
| Goodloe TB<br>3rd et. al./<br>USA      | 52/M | 0 Days  | DM, HTN, CAD | Altered mental status                           | WBC 0/m <sup>3</sup><br>Protein: 46mg/dl<br>Glucose: 121mg/dl; ***                       | NA  | NA | CT head no acute changes                                                  | No acute changes                                                                                                                                                                                                                          | Encephalopathy | NA                                 | Improved                              | Non-severe |
| Elkady A.<br>et. al./<br>EGYPT,<br>USA | 33/F | 4 Days  | None         | Coma and status epilepticus                     | WBC- 26/mm <sup>3</sup><br>90 % lymphocytes<br>Protein: 541mg/dl<br>Glucose: normal; *** | Neg | NA | Diffuse brain edema with right thalamic and right cerebellar hemorrhages. | Bilateral hyperintensity in thalami and cerebellum with hemorrhagic components and rim contrast enhancement within brain; left occipital minimal leptomeningeal enhancement                                                               | AHNE           | High dose IVMP                     | Deceased                              | Severe     |
| Chalil A. et. al./ Canada              | 48/F | 15 Days | None         | Coma, with absent pupil and corneal reflex      | WBC: 76/mm <sup>3</sup> , 65% Neutrophils<br>Protein: NA                                 | NA  | NA | Head CT with CT angiography demonstrated extensive bilateral parietal and | Gadolinium enhancement with hyper-intense signal surrounding the hemorrhages, in                                                                                                                                                          | AHNE           | Hydroxychloroquine and Tocilizumab | The patient was extubated with severe | Severe     |



|                                      |       |         |                                                     |                                                                                                                                                                                                                                                                        |                                                                                                            |        |    |                                                                                                                                                         |                                                                                                                                                                                                                   |                                  |                                                                       |                            |                 |
|--------------------------------------|-------|---------|-----------------------------------------------------|------------------------------------------------------------------------------------------------------------------------------------------------------------------------------------------------------------------------------------------------------------------------|------------------------------------------------------------------------------------------------------------|--------|----|---------------------------------------------------------------------------------------------------------------------------------------------------------|-------------------------------------------------------------------------------------------------------------------------------------------------------------------------------------------------------------------|----------------------------------|-----------------------------------------------------------------------|----------------------------|-----------------|
|                                      |       |         |                                                     |                                                                                                                                                                                                                                                                        | Glucose: **;<br>***<br>SARS-CoV-2<br>PCR: neg                                                              |        |    | occipital intra-<br>parenchymal<br>hemorrhage with<br>intraventricular<br>extension and<br>acute hydroceph-<br>alus                                     | keeping with vaso-<br>genic edema previ-<br>ously seen<br>on CT                                                                                                                                                   |                                  |                                                                       | neurologi-<br>cal deficits |                 |
| Guillan M.<br>et. al./ Spain         | 67/ M | 15 Days | HTN, smok-<br>ing and Alco-<br>hol con-<br>sumption | Confused,<br>gait ataxia,<br>temporo-spa-<br>tial disorien-<br>tation, dysar-<br>thria, partial<br>cortical<br>blindness<br>and ano-<br>sognosia<br>with visual<br>confabula-<br>tion, optic<br>ataxia, diffi-<br>culty in vis-<br>ual scanning,<br>simultagno-<br>sia | WBC: 30/<br>mm <sup>3</sup> , lym-<br>phocytes 90%,<br>Protein:<br>314.1mg/dl<br>Glucose: nor-<br>mal; *** | Mirror | NA | Bilateral parie-<br>tooccipital and<br>right cerebellar<br>hypoattenuating<br>lesions with areas<br>of cortical hyper-<br>attenuating in-<br>volvement. | Arterial ischemic le-<br>sions in the right<br>MCA, the left<br>PCA, and a segment<br>of the right superior<br>cerebellar artery<br>(SCA) with cortical<br>laminar<br>necrosis. The MR<br>angiography nor-<br>mal | CVA                              | Hy-<br>droxychloro-<br>quine,<br>ceftriaxone<br>and azithro-<br>mycin | Improved                   | Non-se-<br>vere |
| Espinosa<br>P.S. et. al./<br>USA     | 72/M  | 6 days  | HTN, hyper-<br>lipidemia,<br>Type 2 DM              | Coma                                                                                                                                                                                                                                                                   | WBC:<br><5/mm3<br>Protein: 27<br>mg/dl<br>Glucose: 87;<br>***                                              | NA     | NA | NA                                                                                                                                                      | Left parietal infarct<br>DWI and FLAIR hy-<br>perintense changes<br>in left parietoocci-<br>pital region                                                                                                          | Encephalo-<br>pathy/in-<br>farct | Hy-<br>droxychloro-<br>quine,<br>ceftriaxone,<br>azithromy-<br>cin    | Not im-<br>proved          | Severe          |
| Giorgianni<br>A. et. al./ It-<br>aly | 22/F  | 15 Days | Type 1 DM                                           | Acute flaccid<br>tetraparesis,                                                                                                                                                                                                                                         | WBC: NA<br>Protein:<br>53mg/dl                                                                             | NA     | NA | Tiny right frontal<br>parenchymal<br>hemorrhage                                                                                                         | Late subacute tiny<br>frontal hemorrhage<br>MRI spine NA                                                                                                                                                          | Transverse<br>Myelitis           | NA                                                                    | Improved,<br>discharged    | Severe          |

|                              |      |         |                                               |                                                 |                                                                                                                     |                                   |     |    |    |                                                                                                                                                         |      |                          |          |                        |  |
|------------------------------|------|---------|-----------------------------------------------|-------------------------------------------------|---------------------------------------------------------------------------------------------------------------------|-----------------------------------|-----|----|----|---------------------------------------------------------------------------------------------------------------------------------------------------------|------|--------------------------|----------|------------------------|--|
|                              |      |         |                                               |                                                 | hyperreflexia, migrant hypoaesthetic and dysesthetic manifestations in lower limbs, fecal and urinary incontinence. | Glucose: 139mg/dl; serum 396mg/dl |     |    |    |                                                                                                                                                         |      |                          |          | to rehab after 30 days |  |
| Abdi S. et. al./ Iran        | 58/M | 30 Days | None                                          | Decreased consciousness, gait ataxia            | WBC: 0/mm <sup>3</sup><br>Protein: 15mg/dl<br>Glucose: 105mg/dl; ***<br>SARS-CoV-2 PCR: neg                         | Negative                          | NA  | NA | NA | MRI diffuse hyperintensity, particularly at the left-side without enhancement, involvement of cortical as well as deep gray matter, and dorsal midbrain | ADEM | IV dexamethasone 8mg TDS | Deceased | Severe                 |  |
| Kakadia B. et. al./ USA      | 69/M | NA      | HTN                                           | Disorientation, inattention, bradyphrenia       | WBC: <5mm <sup>3</sup><br>Protein Normal<br>Glucose: normal; ***<br>SARS-CoV-2 PCR: neg<br>SARS-CoV-2 CSF IgG       | NA                                | NA  | NA | NA | MRI restricted diffusion and hyperintensity in the splenium of the corpus callosum                                                                      | MERS | NA                       | Improved | Non-severe             |  |
| Djellaoui A. et. al./ France | 69/F | NA      | CAD, endometrial cancer, right breast cancer. | Generalized seizures, mutism delirium, asthenia | WBC: <5mm <sup>3</sup><br>Protein: 25mg/dl<br>Glucose: **; ***                                                      | Neg                               | Neg | NA | NA | Symmetric hyperintensities located mainly in the temporal and occipital lobes with                                                                      | PRES | Antiepileptic drugs      | Improved | Non-severe             |  |

|                              |      |        |                                                       |                                                                                               |                                                                                                          |          |    |                                                                                                                                                 |                                                                                                                                                                                                            |                                     |                            |           |            |
|------------------------------|------|--------|-------------------------------------------------------|-----------------------------------------------------------------------------------------------|----------------------------------------------------------------------------------------------------------|----------|----|-------------------------------------------------------------------------------------------------------------------------------------------------|------------------------------------------------------------------------------------------------------------------------------------------------------------------------------------------------------------|-------------------------------------|----------------------------|-----------|------------|
|                              |      |        |                                                       |                                                                                               | SARS-CoV-2<br>PCR: neg                                                                                   |          |    |                                                                                                                                                 | increased ADC values and leptomeningeal enhancement in the same areas in gadolinium sequence                                                                                                               |                                     |                            |           |            |
| Morvan A. et. al./ France    | 56/M | NA     | Malnutrition, nephrolithiasis with left renal abscess | Coma                                                                                          | WBC: < 5mm <sup>3</sup><br>Protein: 79mg/dl<br>Glucose: 45; ***<br>SARS-CoV-2 PCR: neg                   | NA       | NA | Acute hydrocephalus with diffuse cerebral edema, bilateral thalamic hyperdensities concerning for hemorrhage with discrete contrast enhancement | Compression of the 3rd ventricle by both thalami causing hydrocephalus, compression of the 4th ventricle by the cerebellum, diffuse signs of intracranial hypertension and a starting tonsillar engagement | AHNE                                | NA                         | Deceased  | Severe     |
| Forestier G. et. al./ France | 55/M | NA     | None                                                  | Headache, dizziness, impaired consciousness                                                   | WBC< 5mm <sup>3</sup><br>Protein: 46mg.dl protein<br>Glucose: normal; ***                                | NA       | NA | NA                                                                                                                                              | Increased diffusion weighted signal in the splenium of the corpus callosum                                                                                                                                 | Cytotoxic lesion of corpus callosum | NA                         | Improved. | Severe     |
| Munz M. et. al./ Germany     | 60/M | 8 Days | HTN                                                   | Bladder dysfunction, weakness of lower limbs. Hypesthesia below Th9 level and spastic paresis | WBC-27/ mm <sup>3</sup><br>Lymphocytes<br>Protein: 117.7mg/dl<br>Glucose: **; ***<br>SARS-CoV-2 PCR: neg | Negative | NA | NA                                                                                                                                              | MRI spine- Patchy hyperintensity at Th9-10 and at Th3-5 level.<br>MRI brain- normal                                                                                                                        | Transverse Myelitis                 | Methylprednisolone 100mg/d | Improved  | Non-severe |

|                                |      |         |                                                                                   |                                                                                                                              |                                                                                                             |    |     |                                                                                                                                                                                                   |                                                                                                                                                                                                                                                                                      |                     |                                                      |                                 |        |
|--------------------------------|------|---------|-----------------------------------------------------------------------------------|------------------------------------------------------------------------------------------------------------------------------|-------------------------------------------------------------------------------------------------------------|----|-----|---------------------------------------------------------------------------------------------------------------------------------------------------------------------------------------------------|--------------------------------------------------------------------------------------------------------------------------------------------------------------------------------------------------------------------------------------------------------------------------------------|---------------------|------------------------------------------------------|---------------------------------|--------|
| Vaschetto R.<br>et. al./ Italy | 64/M | 16 Days | HTN                                                                               | Coma, tetra-<br>plegia                                                                                                       | WBC < 5mm <sup>3</sup><br>Protein:<br>91.5mg/dl<br>Glucose:<br>117mg/dl; ***<br>SARS-CoV-2<br>PCR: neg      | NA | Neg | Cortical-subcorti-<br>cal blood-related<br>hyperdensities in<br>the bilateral<br>fronto-parietal<br>and right occipital<br>lobes.                                                                 | Signal restriction in<br>parietal and<br>parieto-occipital re-<br>gion and at the pons<br>as well as scattered<br>regions of hemor-<br>rhage                                                                                                                                         | CNS vascu-<br>litis | IVIg x 5<br>days then<br>IVMP x<br>5days             | Mildly im-<br>proved            | Severe |
| Zang T. et.<br>al./ USA        | 40/F | 9 Days  | HTN,<br>dyslipidemia                                                              | Dysphagia,<br>dysarthria,<br>expressive<br>aphasia and<br>mild facial<br>droop                                               | WBC: < 5/<br>mm <sup>3</sup><br>Protein: nor-<br>mal<br>Glucose: nor-<br>mal; ***<br>SARS-CoV-2<br>PCR: neg | NA | NA  | Multifocal patchy<br>areas of white<br>matter hypoatten-<br>uation                                                                                                                                | Extensive patchy<br>hyperintensity bilat-<br>eral<br>frontoparietal white<br>matter, anterior<br>temporal lobes,<br>basal ganglia, exter-<br>nal capsules, and<br>thalami. some of<br>these foci demon-<br>strated DWI<br>changes with ques-<br>tionable<br>minimal enhance-<br>ment | ADEM                | Hy-<br>droxychloro-<br>quine and<br>IVIg x 5<br>days | Improved                        | Severe |
| Cariddi L.P.<br>et. al./ Italy | 64/F | 25 days | HTN, GERD,<br>hyperurice-<br>mia,<br>dyslipidemia,<br>OSA and<br>paroxysmal<br>AF | Altered men-<br>tal status, de-<br>creased left<br>nasolabial<br>fold, paresis<br>in lower<br>limbs, global<br>hyporeflexia. | WBC: <5mm <sup>3</sup><br>Protein: 53<br>mg/dl<br>Glucose: 139;<br>***<br>SARS-CoV-2<br>PCR: neg            | NA | Neg | Posterior frontal<br>and temporo-<br>parieto-occipital<br>symmetric bilat-<br>eral hypodensity<br>of the subcortical<br>white matter, and<br>a tiny left occipi-<br>tal parenchymal<br>hemorrhage | FLAIR image shows<br>that vasogenic<br>edema is reduced<br>but still detectable<br>and T2 Gradient-<br>Echo reveals right<br>temporal hypoden-<br>sity, correlated to<br>hemorrhagic pro-<br>cess                                                                                    | PRES                | Hy-<br>droxychloro-<br>quine                         | Partially im-<br>prove-<br>ment | Severe |

|                                  |       |             |                                                           |                                                                                                                                            |                                                                                                |               |    |                                                                                                                                                                                                                             |                                                     |              |                                                                      |          |                 |
|----------------------------------|-------|-------------|-----------------------------------------------------------|--------------------------------------------------------------------------------------------------------------------------------------------|------------------------------------------------------------------------------------------------|---------------|----|-----------------------------------------------------------------------------------------------------------------------------------------------------------------------------------------------------------------------------|-----------------------------------------------------|--------------|----------------------------------------------------------------------|----------|-----------------|
| Delorme C.<br>et. al./<br>France | 72/ M | 15 Days     | None                                                      | Psychomotor<br>agitation,<br>cognitive and<br>behavioral<br>frontal lobe<br>syndrome,<br>upper limbs<br>myoclonus,<br>cerebellar<br>ataxia | WBC: 6mm <sup>3</sup><br>Protein:23<br>mg/dl<br>Glucose: **;<br>***<br>SARS-CoV-2<br>PCR: neg  | Nega-<br>tive | NA | Brain FDG-<br>PET/CT imaging<br>showed bilateral<br>prefrontal and<br>left-sided parieto-<br>temporal hypo-<br>metabolism and a<br>slight hyperme-<br>tabolism within<br>the cerebellar ver-<br>mis.                        | Unremarkable                                        | Encephalitis | IVIG (dura-<br>tion not<br>specified)                                | Improved | Non-se-<br>vere |
| Delorme C.<br>et. al./<br>France | 66/F  | 7 Days      | None                                                      | Psychomotor<br>slowing,<br>Cognitive<br>and behav-<br>ioral frontal<br>lobe syn-<br>drome                                                  | WBC: 1mm <sup>3</sup><br>Protein:30<br>mg/dl<br>Glucose: **;<br>***<br>SARS-CoV-2<br>PCR: neg  | Nega-<br>tive | NA | Brain FDG-<br>PET/CT marked<br>hypometabolism<br>within the bilat-<br>eral prefrontal<br>and associative<br>posterior cortices<br>and hypermetab-<br>olism within the<br>bilateral striatum<br>and the cerebellar<br>vermis | Non-specific white<br>matter hyperinten-<br>sities. | Encephalitis | IVIG x 5<br>days fol-<br>lowed by IV<br>pulse corti-<br>costeroids   | Improved | Non-se-<br>vere |
| Delorme C.<br>et. al./<br>France | 60/F  | Same<br>day | Temporal<br>lobe epilepsy<br>(hippocam-<br>pal sclerosis) | Acute anxi-<br>ety, de-<br>pressed<br>mood, aka-<br>thisia, gait<br>imbalance,<br>psychomotor<br>agitation,<br>dysexecutive<br>syndrome,   | WBC: <5mm <sup>3</sup><br>Protein:25<br>mg/dl<br>Glucose: **;<br>***<br>SARS-CoV-2<br>PCR: neg | Nega-<br>tive | NA | Brain FDG-<br>PET/CT showed<br>hypometabolism<br>within the bilat-<br>eral orbitofrontal<br>cortices, and a<br>slight hyperme-<br>tabolism in the bi-<br>lateral striatum<br>and cerebellar<br>vermis.                      | Right mesial sclero-<br>sis                         | Encephalitis | IV pulse<br>corticoster-<br>oids x 3<br>days<br>Antidepres-<br>sants | Improved | Non-se-<br>vere |

|                            |       |         |                     |                                                                                  |                                                                                                                  |          |     |                                                                                                                                                              |                                                                                                                                                            |              |                                                            |                     |            |
|----------------------------|-------|---------|---------------------|----------------------------------------------------------------------------------|------------------------------------------------------------------------------------------------------------------|----------|-----|--------------------------------------------------------------------------------------------------------------------------------------------------------------|------------------------------------------------------------------------------------------------------------------------------------------------------------|--------------|------------------------------------------------------------|---------------------|------------|
| cerebellar ataxia          |       |         |                     |                                                                                  |                                                                                                                  |          |     |                                                                                                                                                              |                                                                                                                                                            |              |                                                            |                     |            |
| Delorme C. et. al./ France | 69/M  | 7 Days  | HTN, Type II DM     | Generalized convulsive Status epilepticus                                        | WBC: <5mm <sup>3</sup><br>Protein:66 mg/dl<br>Glucose: **;<br>***<br>SARS-CoV-2 PCR: neg                         | Negative | NA  | Brain FDG-PET/CT showed hypometabolism within the bilateral prefrontal and associative posterior cortices, and hypermetabolism within the cerebellar vermis. | Right orbitofrontal hyperintensities on T2-weighted image                                                                                                  | Encephalitis | Antileptics. IVIG x 5 days. Pulse corticosteroids x 5 days | Improved            | Severe     |
| Afshar H. et. al./ Iran    | 39/F  | 10 Days | NA                  | Drowsiness, generalized tonic-clonic seizure                                     | WBC: <5/mm <sup>3</sup><br>Protein: 19mg/dl<br>Glucose: 61mg/dl<br>SARS-CoV-2 PCR: neg                           | Neg      | Neg | NA                                                                                                                                                           | FLAIR high signal intensities in bilateral thalami, medial temporal and pons without gadolinium enhancement                                                | Encephalitis | Levetiracetam 500mg IVIG followed by IVMP x 6 days         | Improved            | Severe     |
| Novi G. et. al./ Italy     | 64/F  | 15 Days | Vitiligo, HTN, MGUS | Irritability, severe vision loss, sensory deficit in right leg, anosmia, ageusia | WBC: 22/mm <sup>3</sup> (mainly lymphocytes)<br>Protein: 45.2mg/dl<br>Glucose: **;<br>***<br>SARS-CoV-2 PCR: pos | Mirror   | Neg | NA                                                                                                                                                           | Multiple T1 post-Gd enhancing lesions of the brain, associated with a single spinal cord lesion at the T8 level and with bilateral optic nerve enhancement | ADEM         | IVMP x 5 days<br>IVIG x 5 days                             | Partial Improvement | Non-severe |
| Hayashi M. et. al./ Japan  | 75/ M | NA      | Alzheimer's disease | Altered mental status,                                                           | NA                                                                                                               | NA       | NA  | NA                                                                                                                                                           | Abnormal hyperintensity in the                                                                                                                             | MERS         | Favipiravir, pulse                                         | Deceased            | Severe     |

|                              |      |         |                                                     |                                                                                                 |                                                                                                      |          |    |                                                                                                                     |                                                                                                                                                                                                                     |                                           |                                         |                    |        |
|------------------------------|------|---------|-----------------------------------------------------|-------------------------------------------------------------------------------------------------|------------------------------------------------------------------------------------------------------|----------|----|---------------------------------------------------------------------------------------------------------------------|---------------------------------------------------------------------------------------------------------------------------------------------------------------------------------------------------------------------|-------------------------------------------|-----------------------------------------|--------------------|--------|
|                              |      |         |                                                     | hand tremors, urinary incontinence.                                                             |                                                                                                      |          |    |                                                                                                                     | splenium of corpus callosum (SCC) on diffusion-weighted image.                                                                                                                                                      | corticosteroid, ciclesonide and meropenem |                                         |                    |        |
| Yong M.H. et. al./ Singapore | 61/M | 20      | HTN, hyperlipidemia, DM                             | Flaccid tetraplegia                                                                             | NA                                                                                                   | NA       | NA | NA                                                                                                                  | Increased symmetrical FLAIR signal throughout the white matter and thalamus. SWI evidence of microhemorrhages                                                                                                       | AHLE                                      | IVIG then IVMP x 5days                  | Partially improved | Severe |
| Haqiqi A. et. al./ UK        | 56/M | 7 Days  | HTN, CKD, hypercholesterolemia, asthma, pre-obesity | Coma                                                                                            | WBC <5/mm <sup>3</sup><br>Protein: 71mg/dl<br>Glucose: 43mg/dl, serum 86mg.dl<br>SARS-CoV-2 PCR: neg | Positive | NA | Diffuse white matter hypodensity and multiple bilateral white matter hemorrhagic foci involving the corpus callosum | Increased symmetrical FLAIR signal throughout the white matter. There are also some cystic hemorrhagic areas within both cerebral hemispheres. There are some areas of restricted diffusion within the white matter | AHLE                                      | Conservative management                 | Improved           | Severe |
| Varadan B. et. al./ India    | 46/M | 35 Days | Alcoholic CLD                                       | Headache, altered mental status, left facial nerve palsy, paresis in left upper and lower limbs | WBC: >5/mm <sup>3</sup><br>Protein: Increased<br>Glucose: **, ***                                    | NA       | NA | Multifocal non-hemorrhagic lesions in both cerebral hemispheres and the brainstem                                   | Hyperintensity bilateral frontal, parietal lobes, left thalamus, left cerebral peduncle, and medulla. patchy areas of rim enhancement                                                                               | AHLE                                      | 5 days of IVMP and antiedema management | Deceased           | Severe |

|                               |       |         |                                 |                                                                                      |                                                                                         |     |          |    |                                                                                                                                                                                                                                                                                                                        |                                                                                           |                                                |          |            |  |
|-------------------------------|-------|---------|---------------------------------|--------------------------------------------------------------------------------------|-----------------------------------------------------------------------------------------|-----|----------|----|------------------------------------------------------------------------------------------------------------------------------------------------------------------------------------------------------------------------------------------------------------------------------------------------------------------------|-------------------------------------------------------------------------------------------|------------------------------------------------|----------|------------|--|
|                               |       |         |                                 |                                                                                      |                                                                                         |     |          |    |                                                                                                                                                                                                                                                                                                                        | within most of the lesions and DWI changes. Few microbleeds were seen within this lesion. |                                                |          |            |  |
| Gosh R. et. al./ India        | 44/F  | 5 Days  | None                            | Confused, disoriented, memory and thought disorder, generalized tonic-clonic seizure | WBC: 20/mm <sup>3</sup> , 90% lymphocytes<br>Protein: 60g/dl<br>Glucose: 70mg/dl, ***   | Neg | Neg      | NA | T2- hyperintensity left fronto-parietal and right posterior parietal areas with and signal blooming in gradient recalled echo (GRE)                                                                                                                                                                                    | AHNE                                                                                      | IVMP x 5 days                                  | Deceased | Severe     |  |
| Memon A.C. et. al./ USA       | 65/ F | 56 Days | Borderline diabetes and obesity | Lhermitte's phenomenon, urinary incontinence, sensory level at T10                   | WBC: 20/mm <sup>3</sup> , 91% lymphocytes<br>Protein: 81.6g/dl<br>Glucose: 58mg/dl, *** | Neg | Neg      | NA | MRI small lacunar infarct at right lateral pontine region<br>Repeat brain MRI<br>T2-signal changes bilateral cortical spinal tracts affecting the posterior limbs of internal capsules to the cerebral peduncles and pons.<br>Repeat MRI cervical spine show multifocal T2-signal C2-C6 without associated enhancement | Late onset<br>Rapidly Progressive Myelitis                                                | Pulse IVMP x 5 days, PLEX x 5 days             | Improved | Non-severe |  |
| Baghbanian S.M. et. al./ Iran | 53/F  | 15 Days | HTN, DM, Ischemic heart disease | Asymmetric hypotonic paraparesis, areflexia, sensory level                           | WBC :13/mm <sup>3</sup> cells, predominantly lymphocytes,                               | Neg | Negative | NA | Brain MRI normal. MRI spinal cord showed longitudinally extensive transverse                                                                                                                                                                                                                                           | Acute transverse myelitis                                                                 | Corticosteroid and PLEX (unspecified duration) | Improved | Non-severe |  |



|                                    |      |         |                                  |                                                                                                                                                       |                                                                                  |                                                                             |     |                                                                                                                                                                                                           |                                                                                                                                                                                                             |                                            |                  |          |                 |  |  |
|------------------------------------|------|---------|----------------------------------|-------------------------------------------------------------------------------------------------------------------------------------------------------|----------------------------------------------------------------------------------|-----------------------------------------------------------------------------|-----|-----------------------------------------------------------------------------------------------------------------------------------------------------------------------------------------------------------|-------------------------------------------------------------------------------------------------------------------------------------------------------------------------------------------------------------|--------------------------------------------|------------------|----------|-----------------|--|--|
|                                    |      |         |                                  |                                                                                                                                                       | at T11-T12 to<br>pinprick test-<br>ing, impaired<br>propriocep-<br>tion          | Protein: Nor-<br>mal<br>Glucose: nor-<br>mal; ***<br>SARS-CoV-2<br>PCR: neg |     |                                                                                                                                                                                                           |                                                                                                                                                                                                             | myelitis in the T8-<br>T10 cord<br>segment |                  |          |                 |  |  |
| Fumery T.<br>et. al./ Bel-<br>gium | 38/F | 15 Days | None                             | Paresis of<br>lower limbs,<br>hypoesthesia,<br>bladder dys-<br>function, de-<br>creased sen-<br>sation below<br>T4 level, uri-<br>nary reten-<br>tion | WBC: 337/<br>mm3 lympho-<br>cytic,<br>Protein:<br>78mg/dl<br>Glucose: **;<br>*** | Neg                                                                         | Neg | NA                                                                                                                                                                                                        | Hyperintense lon-<br>gitudinal signal in-<br>volving C3-C4, no<br>gadolinium en-<br>hancement                                                                                                               | Acute trans-<br>verse myeli-<br>tis        | IVMP x 8<br>days | Improved | Non-se-<br>vere |  |  |
| Franceschi<br>A.M. et. al./<br>USA | 48/M | 21 Days | None                             | Altered men-<br>tal status                                                                                                                            | NA                                                                               | NA                                                                          | NA  | Focal vaso-<br>genic/cytotoxic<br>edema in the pos-<br>terior parietooc-<br>cipital regions bi-<br>laterally, which<br>was subcortical in<br>distribution,<br>with a small<br>right-sided hem-<br>orrhage | Vasogenic edema<br>in the posterior<br>parieto-occipital re-<br>gions with subacute<br>blood<br>products.<br>SWI petechial<br>hemorrhages dif-<br>fusely distributed<br>throughout the cor-<br>pus callosum | PRES                                       | None             | Improved | Severe          |  |  |
| Franceschi<br>A.M. et. al./<br>USA | 67/F | NA      | HTN, DM,<br>CAD, gout,<br>asthma | Altered men-<br>tal status,<br>lethargy,<br>confusion                                                                                                 | NA                                                                               | NA                                                                          | NA  | Edema in the bi-<br>lateral parietooc-<br>cipital regions<br>with associated<br>mass effect and                                                                                                           | Multiple areas of re-<br>stricted diffusion<br>with associated<br>edema, in the poste-<br>rior parieto-                                                                                                     | PRES                                       | None             | Improved | Non-se-<br>vere |  |  |

|                               |      |        |                             |                                                               |                                                                                |    |     |    |                             |                                                                                                                                                                                                                 |                           |                        |          |        |
|-------------------------------|------|--------|-----------------------------|---------------------------------------------------------------|--------------------------------------------------------------------------------|----|-----|----|-----------------------------|-----------------------------------------------------------------------------------------------------------------------------------------------------------------------------------------------------------------|---------------------------|------------------------|----------|--------|
|                               |      |        |                             |                                                               |                                                                                |    |     |    | cortical sulcal effacement. | occipital. SWI extensive superimposed hemorrhages in the parieto-occipital region along with abnormal enhancement.                                                                                              |                           |                        |          |        |
| Abdelhady M. et. al./ Qatar   | 52/M | 3 Days | DM type II, G6PD deficiency | Flaccid paralysis and urinary retention                       | WBC:>5/mm3 Lymphocytes Protein: increased Glucose: **, *** SARS-CoV-2 PCR: neg | NA | NA  | NA |                             | Brain MRI was normal, but the spinal cord MRI displayed a continuous long segment of T2WI hyperintensity in the ventral horns of grey matter in the upper and mid-thoracic cord with no intervening normal cord | Acute Myelitis            | Steroids and acyclovir | Deceased | Severe |
| AlKetbi V. et. al./ UAE       | 32/M | 2 Days | None                        | Bilateral lower limb paresis and hypotonia, urinary retention | NA                                                                             | NA | Neg | NA |                             | Extensive diffuse hyperintense signal involving predominantly the grey matter of the cervical, thoracic spinal cord.                                                                                            | Acute Transverse Myelitis | Pulse IVMP x 5 days    | Improved | Severe |
| Chakraborty U. et. al./ India | 59/M | NA     | None                        | Ascending flaccid paraplegia, hypotonia of both               | WBC< 5/ mm <sup>3</sup> Protein: 71.4mg/dl                                     | NA | NA  | NA |                             | MRI spine revealed hyperintensity in the spinal cord at                                                                                                                                                         | Acute transverse myelitis | IVMP x 1 day           | Deceased | Severe |

|                                |      |         |                                            |                                                                                                                    |                                                                                             |     |     |    |                                                                                                                                                                                         |                           |                                                    |                     |            |  |
|--------------------------------|------|---------|--------------------------------------------|--------------------------------------------------------------------------------------------------------------------|---------------------------------------------------------------------------------------------|-----|-----|----|-----------------------------------------------------------------------------------------------------------------------------------------------------------------------------------------|---------------------------|----------------------------------------------------|---------------------|------------|--|
|                                |      |         |                                            | lower limbs, areflexia in lower limbs, diminished sensation below T10 level.                                       | Glucose: 75mg/dl; ***<br>SARS-CoV-2 PCR: neg                                                |     |     |    | T6–T7 vertebral level                                                                                                                                                                   |                           |                                                    |                     |            |  |
| Chow C.C.N. et. al./ Australia | 60/M | 18 Days | HTN, hyperlipidemia, Ex-smoker             | Bilateral lower limb paresis, urinary retention, constipation, hyperreflexia, reduced proprioception of lower limb | WBC<5/mm <sup>3</sup><br>Protein: 79mg/dl<br>Glucose: 32mg/dl; ***<br>SARS-CoV-2 PCR: neg   | NA  | Neg | NA | MRI spine demonstrated a long segment of T2 signal from T7 to T10, without significant enhancement                                                                                      | Acute transverse myelitis | IVMP x 3 days                                      | Improved            | Non-severe |  |
| McCuddy M. et. al./ USA        | 37/F | 22      | DM II, HTN, obesity, Pregnancy at 30 weeks | Paresis in upper and lower limbs, hyperreflexia                                                                    | WBC: <5/mm <sup>3</sup><br>Protein: 95mg/dl<br>Glucose: 85mg/dl; ***<br>SARS-CoV-2 PCR: neg | Neg | NA  | NA | Multiple T2 hyperintense lesions with restricted diffusion involving the corpus callosum, bilateral cerebral white matter, right pons and in the bilateral medulla and some enhancement | ADEM                      | Decadron 20mg IV x 5 days and 10 mg x 5 days, PLEX | Improved            | Severe     |  |
| McCuddy M. et. al./ USA        | 56/M | 20      | DM II, CKD stage 3, asthma                 | Coma, leftward eye deviation, hyporeflexia                                                                         | WBC: <5/mm <sup>3</sup><br>Protein: 55mg/dl<br>Glucose: 112mg/dl; ***                       | Neg | NA  | NA | Several T2 hyperintense lesions, many restricted diffusion in cerebral white matter as well as deep cerebellum.                                                                         | ADEM                      | IVMP x 5 days then IVIG x 3 days, PLEX             | Partial improvement | Severe     |  |

|                               |      |        |                                                                                                  |                                                                                                                                         |                                                                                                                                |         |     |    |                                                                                                                                                                                                                  |                                     |                                                       |                          |                 |
|-------------------------------|------|--------|--------------------------------------------------------------------------------------------------|-----------------------------------------------------------------------------------------------------------------------------------------|--------------------------------------------------------------------------------------------------------------------------------|---------|-----|----|------------------------------------------------------------------------------------------------------------------------------------------------------------------------------------------------------------------|-------------------------------------|-------------------------------------------------------|--------------------------|-----------------|
| SARS-CoV-2<br>PCR: neg        |      |        |                                                                                                  |                                                                                                                                         |                                                                                                                                |         |     |    |                                                                                                                                                                                                                  |                                     |                                                       |                          |                 |
| McCuddy<br>M. et. al./<br>USA | 70/F | 16     | DM II, HTN,<br>HLD, CKD<br>stage 2, obe-<br>sity, periph-<br>eral neuropa-<br>thy, glau-<br>coma | Coma                                                                                                                                    | WBC: <5/<br>mm <sup>3</sup><br>Protein:<br>63mg/dl<br>Glucose:<br>87mg/dl; ***<br>SARS-CoV-2<br>PCR: neg                       | Present | NA  | NA | Several T2 hyperin-<br>tense lesions, most<br>restricted diffusion,<br>in deep white mat-<br>ter and corpus cal-<br>losum as well as left<br>brachium spared.<br>Minimum enhance-<br>ment and no hem-<br>orrhage | ADEM                                | IVMP x 5<br>days, IVIG x<br>3 days and<br>PLEX        | Partial im-<br>provement | Severe          |
| Sarma D. et.<br>al./ USA      | 28/F | 7 Days | Hypothy-<br>roidism                                                                              | Back pain,<br>paresthesia<br>in lower ex-<br>tremities,<br>numbness on<br>tip of tongue,<br>urinary re-<br>tention, T5<br>sensory level | WBC: 125/<br>mm <sup>3</sup> lympho-<br>cytes,<br>Protein:<br>60mg/dl<br>Glucose: nor-<br>mal; ***<br>SARS-CoV-2<br>PCR: neg   | NA      | NA  | NA | MRI cervical, tho-<br>racic spine w/wo<br>contrast revealed<br>elongated signal<br>changes throughout<br>the spinal cord to<br>the conus<br>medullaris and in-<br>volving the medulla                            | Acute trans-<br>verse myeli-<br>tis | Predniso-<br>lone and<br>PLEX x 2 cy-<br>cles         | Improved                 | Non-se-<br>vere |
| Sotoca J. et.<br>al./ Spain   | 69/W | 8 Days | None                                                                                             | Right facial,<br>left hand hy-<br>poesthesia,<br>subtle hand<br>weakness                                                                | WBC 75/mm <sup>3</sup><br>(98% lympho-<br>cytes)<br>Protein:<br>283mg/d<br>Glucose: nor-<br>mal; ***<br>SARS-CoV-2<br>PCR: neg | Neg     | Neg | NA | MRI Spinal cord:<br>T2-hyperintensity<br>extending from the<br>medulla oblongata<br>to C7,<br>diffuse patchy en-<br>hancing lesions<br>Repeat MRI: trans-<br>versally and cau-<br>dally<br>progression until T6  | Acute ne-<br>crotizing<br>Myelitis  | IVMP x 5<br>days fol-<br>lowed by<br>PLEX x 5<br>days | Improved                 | Non-se-<br>vere |

|                           |      |        |      |                                                                                                                                                  |                                                              |          |     |        |                                                                                                                                      |                           |                                               |                     |            |  |
|---------------------------|------|--------|------|--------------------------------------------------------------------------------------------------------------------------------------------------|--------------------------------------------------------------|----------|-----|--------|--------------------------------------------------------------------------------------------------------------------------------------|---------------------------|-----------------------------------------------|---------------------|------------|--|
|                           |      |        |      |                                                                                                                                                  |                                                              |          |     |        | level with similar enhancement                                                                                                       |                           |                                               |                     |            |  |
| Utukuri P.S. et. al./ USA | 44/M | NA     | NA   | Lethargy, urinary retention, lower limb paresis and numbness, dysarthria, bilateral arm weakness                                                 | WBC: 6/ mm <sup>3</sup>                                      | Neg      | NA  | Normal | MRI Brain several periventricular and juxtacortical lesions                                                                          | ADEM                      | IVMP followed by IVIG (duration not reported) | Improved            | Non-severe |  |
|                           |      |        |      |                                                                                                                                                  | 92% lymphocytes                                              |          |     |        | Homogeneous brisk enhancement associated with the dominant left parietal lobe juxtacortical/cortical lesion.                         |                           |                                               |                     |            |  |
|                           |      |        |      |                                                                                                                                                  | Protein: 36mg/dl<br>Glucose: ** ; ***<br>SARS-CoV-2 PCR: neg |          |     |        | Non-enhancing T2 hyperintense lesions throughout the cervical and thoracic spine                                                     |                           |                                               |                     |            |  |
| Valiuddin H. et. al./     | 61/F | 7 days | None | Bilateral upper and lower limb paresis, ankle numbness and tingling in hands and feet up to level of abdomen, urinary retention and constipation | WBC: 3/mm <sup>3</sup>                                       | Negative | Neg | NA     | Extensive intramedullary disease throughout the entire length of the cervical spinal cord without pathological contrast enhancement. | Acute transverse myelitis | IVMP x 5 days then PLEX x 5 cycles            | Partial improvement | Non-severe |  |
|                           |      |        |      |                                                                                                                                                  | lymphocytes                                                  |          |     |        |                                                                                                                                      |                           |                                               |                     |            |  |
|                           |      |        |      |                                                                                                                                                  | Protein: 87mg/dl<br>Glucose: **; ***<br>SARS-CoV-2 PCR: neg  |          |     |        |                                                                                                                                      |                           |                                               |                     |            |  |
| Durrani M. et. al./ USA   | 24/M | 9 Days | None | Bilateral lower limb paresis,                                                                                                                    | WBC:>5/mm <sup>3</sup> lymphocytic<br>Protein: Normal        | Neg      | Neg | NA     | The MRI showed a non-enhancing T2-weighted hyperintense spanning T7-                                                                 | Acute Transverse Myelitis | IVMP (duration not reported)                  | Improved            | Non-severe |  |

|                               |      |         |    |                                                         |                                                                                             |     |     |                                                                                                        |                                                                                                                                                                                    |           |                                        |          |            |  |
|-------------------------------|------|---------|----|---------------------------------------------------------|---------------------------------------------------------------------------------------------|-----|-----|--------------------------------------------------------------------------------------------------------|------------------------------------------------------------------------------------------------------------------------------------------------------------------------------------|-----------|----------------------------------------|----------|------------|--|
|                               |      |         |    | overflow urinary incontinence,                          | Glucose: normal; ***<br>(Values not reported)<br>SARS-CoV-2 PCR: neg                        |     |     |                                                                                                        |                                                                                                                                                                                    | T12 level |                                        |          |            |  |
| Parsons T. et. al./ USA       | 51/F | 18 Days | NA | Coma, left oculocephalic response impaired              | WBC < /5mm <sup>3</sup><br>Protein: 62mg/dl<br>Glucose: 56mg/dl; ***<br>SARS-CoV-2 PCR: neg | Neg | Neg | CT angiogram normal                                                                                    | FLAIR hyperintensity in deep hemispheric and juxtacortical white matter with hyperintense on DWI and small amount of intraventricular hemorrhage (IVH)                             | ADEM      | IVM x 5 Days followed by IVIG x 5 days | Improved | Severe     |  |
| Assunção F.B. et. al./ Brazil | 49/M | NA      | NA | Delayed recovery from sedation, 5 days after extubation | NA                                                                                          | NA  | NA  | NA                                                                                                     | FLAIR multiple hyperintensities deep and periventricular cerebral white matter, splenium of the corpus callosum, and pons. All lesions show restricted diffusion on DWI sequences. | ADEM      | NA                                     | NA       | Severe     |  |
| Poyiadji N. et. al./ USA      | 58/F | 3 Day   | NA | Altered Mental Status                                   | Limited due to traumatic lumbar puncture                                                    | NA  | NA  | Symmetric low attenuation within the bilateral medial thalami with normal CT angiogram and CT venogram | Hemorrhagic rim-enhancing lesions within the bilateral thalami, medial temporal lobes, and sub-insular regions                                                                     | AHNE      | IVIG                                   | NA       | Non-severe |  |

|                           |      |         |                                             |                                        |                                                                                                      |          |     |                                                                                                                                                   |                                                                                                                                                                                                      |       |                                       |                     |        |
|---------------------------|------|---------|---------------------------------------------|----------------------------------------|------------------------------------------------------------------------------------------------------|----------|-----|---------------------------------------------------------------------------------------------------------------------------------------------------|------------------------------------------------------------------------------------------------------------------------------------------------------------------------------------------------------|-------|---------------------------------------|---------------------|--------|
| Langley L. et. al./ UK    | 53/M | NA      | NA                                          | Coma, globally hypotonic and areflexia | WBC < /5mm <sup>3</sup><br>Protein: reported as normal<br>Glucose: **;<br>***<br>SARS-CoV-2 PCR: neg | Positive | Neg | NA                                                                                                                                                | MRI of the brain and orbits showed multiple hyperintense lesions within the subcortical and deep white matter of the frontoparietal lobes bilaterally. SWI evidence of parenchymal micro-hemorrhages | ADEM  | IVMP x 3 days and tapering prednisone | Partial improvement | Severe |
| Dixon, L. et. al./ UK     | 59/F | 10 Days | Aplastic anemia                             | GTCS, reduced consciousness            | WBC: <5/mm <sup>3</sup><br>Protein: 230mg/dl<br>Glucose: **;<br>***<br>SARS-CoV-2 PCR: neg           | NA       | NA  | CT showed increased hypodensity and swelling of the brain stem, and a new area of cortical and subcortical hypodensity in the left occipital lobe | Extensive, symmetrical changes throughout the supratentorial and infratentorial compartments. There was diffuse swelling and hemorrhage in the brain stem and both amygdalae                         | AHNE  | High dose dexamethasone               | Deceased            | Severe |
| Rasmussen C. et. al./ USA | 66/F | 19 Days | Pulmonary sarcoidosis, CAD, DM II, HTN, HLD | Right sided weakness, aphasic          | NA                                                                                                   | NA       | NA  | Hypodensities within the corpus callosum.                                                                                                         | Multiple areas of diffusion restriction within the corpus callosum, corona radiata, and centrum semiovale, with associated T2-FLAIR hyperintensities                                                 | CLOCC | NA                                    | Partially improved  | Severe |

|                                     |      |          |                       |                                                                                                                                                 |                                                                                                                  |     |     |                                                                                                                       |                                                                                                                                        |                           |                                         |                     |            |
|-------------------------------------|------|----------|-----------------------|-------------------------------------------------------------------------------------------------------------------------------------------------|------------------------------------------------------------------------------------------------------------------|-----|-----|-----------------------------------------------------------------------------------------------------------------------|----------------------------------------------------------------------------------------------------------------------------------------|---------------------------|-----------------------------------------|---------------------|------------|
| Elkhaled W. et. al./ Qatar          | 23/M | 2 Days   | None                  | Auditory hallucination, restlessness, suicidal ideation, altered sensorium, disorientation and delayed verbal response                          | WBC <5 /mm <sup>3</sup><br>Protein: normal<br>Glucose: normal; ***                                               | NA  | NA  | CT head massive intracranial hemorrhage with diffuse brain edema along with subfalcine and transtentorial herniation. | Brain MRI revealed an isolated oval-shaped lesion in the splenium of corpus callosum                                                   | CLOCC                     | Dexamethasone, Favipiravir              | Deceased            | Severe     |
| Agarwal N. et. al. /Italy           | 73/M | 21 Days  | Altered mental status | None                                                                                                                                            | WBC < 5 /mm <sup>3</sup><br>Protein 38mg/dl<br>Glucose: 36mg/dl<br>SARS-CoV-2 PCR: neg                           | Neg | NA  | Hypodense lesion within the splenium with mild mass effect on the medial wall of the lateral ventricle                | Isolated lesion in the splenium, with a longitudinal                                                                                   | CLOCC                     | NO IVIG or steroids                     | Improved,           | severe     |
| Lisnic V. et. al./ Moldova          | 27/M | 15 hours | HIV                   | Paresthesia and numbness in legs and right arm, spastic tetraparesis, urinary retention, constipation, T7 superficial and C7 deep sensory level | WBC: < /5mm <sup>3</sup><br>Protein: normal (number not reported)<br>Glucose: normal; ***<br>SARS-CoV-2 PCR: neg | Neg | Neg | NA                                                                                                                    | Spinal cord MRI revealed an extensive C4-T5 lesion mainly in posterior columns and right lateral column without gadolinium enhancement | Acute Transverse Myelitis | IVMP x 5 days followed by PLEX x 5 days | Improved            | Non-severe |
| Zachariadis A. et. al./ Switzerland | 63/M | 12 Days  | Obesity               | Moderate paresis in lower limbs,                                                                                                                | WBC: 16/mm <sup>3</sup><br>Protein: 57.3mg/dl                                                                    | NA  | NA  | NA                                                                                                                    | Brain and Spine MRI reported as normal                                                                                                 | Acute Transverse Myelitis | IVIG x 5 days followed by 5-            | Partial Improvement | Non-severe |



pyramidal signs, sensory level at T10. Glucose: 34; \*\*\* SARS-CoV-2 PCR: neg

day steroid therapy

\*\* =CSF glucose not available. \*\*\* = serum glucose not available. Abs, Antibodies; EVD, External Venous drainage; CSF, Cerebrospinal fluid; IVIG, Intravenous immunoglobulin; IVMP, Intravenous methylprednisone; ADEM, Acute disseminated encephalomyelitis; PRES, Posterior Reversible encephalopathy syndrome; LETM, Longitudinal extensive transverse myelitis; PLEX, Plasmapheresis; AHNE, Acute hemorrhagic necrotizing encephalitis; CLOCC, Cytotoxic lesion of the corpus callosum; MERS, Mild encephalitis/ encephalopathy with reversible splenial lesion; AHLE, Acute hemorrhagic leukoencephalitis.

**Table S2.** Studies with data from case reports and case series on COVID-19 associated PNS manifestation.

| Author/<br>country                 | Patient<br>age<br>/gender | Time<br>duration<br>from<br>COVID<br>-19 to<br>neurological<br>symptom<br>onset | Co-<br>morbidity | Neurological<br>presentation | CSF findings                                                                                | Serum Anti gan-<br>gliosides anti-<br>bodies        | MRI findings                                                                                                       | Diagnosis/<br>Variant | Manage-<br>ment                         | Outcome                       | Severity |
|------------------------------------|---------------------------|---------------------------------------------------------------------------------|------------------|------------------------------|---------------------------------------------------------------------------------------------|-----------------------------------------------------|--------------------------------------------------------------------------------------------------------------------|-----------------------|-----------------------------------------|-------------------------------|----------|
| Ottaviani D.<br>et.al /Italy       | 66/F                      | 7 Days                                                                          | HTN              | Paraplegia, are-<br>flexia   | CSF: WBC<5/mm <sup>3</sup> ,<br>Total Protein:<br>108mg/dL<br>Glucose: *** glu-<br>cose: ** | Negative                                            | NA                                                                                                                 | AIDP                  | IVIG x 5<br>days                        | Did not<br>improve            | Severe   |
| Pfefferkorn T.<br>et. al./ Germany | 51/M                      | 12 days                                                                         | NA               | Tetraparesis,<br>Areflexia   | CSF: WBC:<br>9cells/mm <sup>3</sup><br>Total protein: Nor-<br>mal<br>Glucose: **, ***       | Serum Anti-<br>ganglioside anti-<br>bodies negative | MRI spine<br>massive symmet-<br>rical contrast<br>enhancement of the<br>spinal nerve roots at<br>all levels of the | AIDP                  | IVIG x 5<br>days, PLEX x<br>14 sessions | Partial im-<br>prove-<br>ment | Severe   |

|                             |      |         |                                |                                                                         |                                                                                             |                                                                                                                                                                                     |                                                                      |      |                                                      |                     |            |  |
|-----------------------------|------|---------|--------------------------------|-------------------------------------------------------------------------|---------------------------------------------------------------------------------------------|-------------------------------------------------------------------------------------------------------------------------------------------------------------------------------------|----------------------------------------------------------------------|------|------------------------------------------------------|---------------------|------------|--|
|                             |      |         |                                |                                                                         |                                                                                             |                                                                                                                                                                                     | spine including the cauda equina, anterior and posterior nerve roots |      |                                                      |                     |            |  |
| Scheidl E. et. al. /Germany | 54/F | 21 days | None                           | Paresis of lower extremities, areflexia and paresthesia                 | CSF: WBC <5/mm3<br>Protein 140g/L<br>Glucose: **. ***                                       | NA                                                                                                                                                                                  | MRI cervical spine without contrast normal                           | AIDP | IVIG x 5 days                                        | Improved            | Non-severe |  |
| Hutchins K.L. et. al. /USA  | 21/M | 16 Days | None                           | Facial weakness, dysarthria, diffuse areflexia                          | CSF: WBC <5/mm3<br>Glucose, 65mg/dl; ***<br>Protein, 49mg/dl                                | NA/serologies were negative except for serum HSV, IgG and IgM                                                                                                                       | Abnormal enhancement of bilateral CN VII, CNV VI, Right CN III       | BFP  | PLEX x 5 cycles<br>Denied IVIG for religious reasons | Improved            | Non-severe |  |
| Arnaud S. et.al. / France   | 64/M | 22 Days | DM type 2                      | Paraparesis, areflexia, paresthesia's                                   | CSF: WBC: <5/mm3<br>Glucose: **, ***<br>Protein 160mg/dl<br>PCR: negative for SARs-CoV-2    | Viral serologies are negative                                                                                                                                                       | NA                                                                   | AIDP | IVIG x 5 days                                        | Improved            | Non-severe |  |
| Su X.W et.al. /USA          | 72/M | 6 Days  | CAD, HTN, Alcohol use disorder | Paresthesia's Quadriplegia, areflexia, sensory loss distal to knees B/L | WBC: 1 cell/mm <sup>3</sup><br>Protein: 313mg/dl<br>Glucose: **, ***<br>SARS-CoV-2 PCR: neg | Anti-ganglioside GM1, GD1b, and GQ1b and acetylcholine receptor binding, voltage-gated calcium channel, antinuclear, and anti-neutrophil cytoplasmic antibody titers were negative. | NA                                                                   | AIDP | IVIG x 6 days                                        | Did not improve     | Severe     |  |
| Riva, N. et.al/ Italy       | 60/M | 17 Days | None                           | Progressive limb weakness, Paresthesias                                 | WBC: <5/mm3<br>Protein: normal<br>Glucose: **, ***                                          | Anti-ganglioside antibodies: Negative,                                                                                                                                              | MRI cervical spine was unremarkable                                  | AIDP | IVIG x 5days                                         | Partial improvement | Non-severe |  |

|                                     |      |         |      |  |                                                                                                             |                                                                                                                                               |                                            |                            |       |                     |                             |            |
|-------------------------------------|------|---------|------|--|-------------------------------------------------------------------------------------------------------------|-----------------------------------------------------------------------------------------------------------------------------------------------|--------------------------------------------|----------------------------|-------|---------------------|-----------------------------|------------|
|                                     |      |         |      |  | , facial diplegia, hypophonia dysarthria                                                                    | SARS-CoV-2 PCR: neg                                                                                                                           | SARS IgG positive                          |                            |       |                     |                             |            |
| Otmani H. et. al. / Morocco         | 70/F | 3 Days  | RA   |  | Paresthesia, Quadriplegia, ,                                                                                | WBC<5/mm3<br>Protein 100mg/dl<br>SARS-CoV-2 PCR: neg                                                                                          | NA                                         | NA                         | AMSAN | IVIG x 5days        | No significant improvement. | Non-severe |
| Camdessanche. J.P., et. al. /France | 64/M | 7 Days  | None |  | Paresthesia, Tetra paralysis                                                                                | WBC: <5/mm <sup>3</sup><br>Protein: 166mg/dl<br>Glucose: **, ***                                                                              | Anti-gangliosides antibodies: negative     | N A                        | AIDP  | IVIG x 5 days       | NA                          | Severe     |
| Caamaño D.S.J et al. /Spain         | 61/M | 10 Days | NA   |  | Bilateral facial nerve palsy                                                                                | WBC: <5/mm <sup>3</sup><br>Protein 20mg/dl<br>Glucose: **, ***                                                                                | NA                                         | MRI brain was unremarkable | BFP   | Low dose prednisone | Partial improvement         | Non-severe |
| Webb S. et. al. /UK                 | 57/M | 7 Days  | HTN  |  | Paresthesia<br>Difficulty walking                                                                           | WBC: <5/mm <sup>3</sup><br>Protein: 51mg/dl<br>Glucose**, ***<br>SARS-CoV-2 PCR: neg                                                          | anti-ganglioside antibodies were negative. | NA                         | AIDP  | IVIG x 5 days       | Did not improve             | Severe     |
| Assini A et. al. / Italy            | 55/M | 20 Days | None |  | Bilateral ptosis, dysphagia, dysphonia, bilateral paralysis of hypoglossal nerve, 10 <sup>th</sup> CN palsy | WBC: <5/mm <sup>3</sup><br>Protein was normal<br>Glucose **, ***.<br>Oligoclonal bands in CSF, increased IgG ratio 233<br>SARS-CoV-2 PCR: neg | Antiganglioside antibodies negative        | NA                         | MFS   | IVIG x 5 days       | Improved                    | Non-severe |
| Assini A et. al./Italy Pre-print    | 60/M | 20 Days | None |  | Right Foot drop, dysautonomia                                                                               | WBC: <5/mm <sup>3</sup><br>Protein was normal.<br>Glucose: **, ***                                                                            | Antiganglioside antibodies: negative       | NA                         | AMSAN | IVIG x 5 days       | Improved                    | Severe     |

|                                |      |         |      |                                                                                                                              |                                                                                                     |                                               |                                                                          |       |                                                                                                     |                               |                 |  |
|--------------------------------|------|---------|------|------------------------------------------------------------------------------------------------------------------------------|-----------------------------------------------------------------------------------------------------|-----------------------------------------------|--------------------------------------------------------------------------|-------|-----------------------------------------------------------------------------------------------------|-------------------------------|-----------------|--|
|                                |      |         |      |                                                                                                                              | Oligoclonal bands<br>in CSF, increased<br>ratio IgG/albumin:<br>170                                 |                                               |                                                                          |       |                                                                                                     |                               |                 |  |
| Toscano, G. et.<br>al. /Italy  | 77/F | 7 Days  | None | Flaccid areflexic<br>tetraplegia evolving to<br>facial weakness,<br>upper limb<br>paresthesia,<br>and respiratory<br>failure | WBC 4/mm <sup>3</sup> , pro-<br>tein level, 101 mg/dl<br>Glucose: **, ***<br>SARS-CoV-2 PCR:<br>neg | Negative Anti-<br>ganglioside anti-<br>bodies | Spine: enhancement<br>of caudal nerve<br>roots                           | ASMAN | IVIG x 2, 2 <sup>nd</sup><br>cycle of IVIG<br>was ineffec-<br>tive 7 days<br>after first cy-<br>cle | Partial im-<br>prove-<br>ment | Severe          |  |
| Toscano, G., et.<br>al. /Italy | 23/M | 10 Days | None | Facial diplegia<br>and<br>generalized are-<br>flexia<br>evolving to<br>lower limb par-<br>esthesia with<br>ataxia            | WBC<5mm <sup>3</sup><br>protein level, 123<br>mg/dl;<br>Glucose: **, ***<br>SARS-CoV-2 PCR:<br>neg  | NA                                            | MRI enhancement<br>of facial nerve bilat-<br>erally<br><br>Spine: normal | ASMAN | IVIG                                                                                                | Partial im-<br>prove-<br>ment | Non-se-<br>vere |  |
| Toscano, G. et.<br>al. /Italy  | 55/M | 10 Days | None | Flaccid tetrapare-<br>sis<br>and facial weak-<br>ness<br>evolving to are-<br>flexia<br>and<br>respiratory fail-<br>ure       | WBC<5/mm <sup>3</sup><br>Protein level, 193<br>mg/dl;<br>Glucose: **, ***<br>SARS-CoV-2 PCR:<br>neg | Negative Anti-<br>ganglioside anti-<br>bodies | Head: normal<br>Spine: enhancement<br>of caudal nerve<br>roots           | AMAN  | IVIG x 2 cy-<br>cles                                                                                | Poor out-<br>comes            | severe          |  |

|                                 |      |        |                      |                                                                                                            |                                                                                               |                                                                                                                                                            |                                                                    |                             |                 |                     |            |
|---------------------------------|------|--------|----------------------|------------------------------------------------------------------------------------------------------------|-----------------------------------------------------------------------------------------------|------------------------------------------------------------------------------------------------------------------------------------------------------------|--------------------------------------------------------------------|-----------------------------|-----------------|---------------------|------------|
| Toscano, G. et. al. /Italy      | 76/M | 5 Days | None                 | Flaccid areflexic tetraparesis and ataxia                                                                  | WBC: <5/mm <sup>3</sup><br>Normal protein level;<br>Glucose **: ***<br>SARS-CoV-2 PCR: neg    | NA                                                                                                                                                         | Head: normal<br>Spine: normal                                      | AIDP                        | IVIG            | Partial Improvement | Non-severe |
| Toscano, G., et. al. /Italy     | 61/M | 7 Days | None                 | Facial weakness, flaccid areflexic paraplegia and respiratory failure                                      | WBC: 3/mm <sup>3</sup><br>protein level, 40 mg/dl;<br>Glucose: **, ***<br>SARS-CoV-2 PCR: neg | positive SARS-CoV-2 IgG<br>Negative Anti-ganglioside antibodies                                                                                            | Head: not performed<br>Spine: normal                               | AIDP                        | IVIG, PLEX      | Partial Improvement | Severe     |
| Dinkin, M. et. al. / USA        | 36/M | 4 Days | Infantile strabismus | L ptosis, diplopia, B/L leg paresthesia, L oculomotor palsy, B/L 6 CN palsy, and hypoesthesia, Gait ataxia | NA                                                                                            | A ganglioside antibody panel was negative                                                                                                                  | Enhancement T2-hyperintensity enlargement of L oculomotor nerve.   | MFS                         | IVIG x 3 days   | Improved            | Non-severe |
| Dinkin, M. et. al. / USA        | 71/F | 2 Days | NA                   | Diplopia, unable to abduct Right eye                                                                       | WBC: 5/mm <sup>3</sup><br>Protein: normal<br>Glucose: **, ***                                 | NA                                                                                                                                                         | Enhancement of the optic nerve sheaths and posterior Tenon capsule | 6 <sup>th</sup> Nerve palsy | No IVIG or PLEX | Improved            | Non-severe |
| Gutierrez-Ortiz. et. al. /Spain | 50/M | 5 Days | Bronchial Asthma     | Areflexia, Broad based gait, right internuclear ophthalmoparesis, Right fascicular oculomotor palsy        | White count: 0<br>Protein 80mg/dl<br>Glucose 62mg/dl<br>SARS-CoV-2 PCR: neg                   | . Antibodies to gangliosides (GM1, GM2, GM3, GD1a, GD1b, GD3, GT1a, GT1b, GQ1b, and anti-sulfatide antibodies) in the serum were examined. The patient was | NA                                                                 | MFS                         | IVIG x 5 days   | Improved            | Non-severe |

|                                 |      |         |                                                           |                                                                                                |                                                                                            |                                                          |                                                                                                |                        |                                         |                       |            |                                                                   |
|---------------------------------|------|---------|-----------------------------------------------------------|------------------------------------------------------------------------------------------------|--------------------------------------------------------------------------------------------|----------------------------------------------------------|------------------------------------------------------------------------------------------------|------------------------|-----------------------------------------|-----------------------|------------|-------------------------------------------------------------------|
|                                 |      |         |                                                           |                                                                                                |                                                                                            |                                                          |                                                                                                |                        |                                         |                       |            | only positive for the antiGD1b-immunoglobulin G (IgG) antibody. T |
| Gutierrez-Ortiz. et. al. /Spain | 39/M | 3 Days  | None                                                      | Areflexia, severe abduction deficit in both eyes, fixation nystagmus, impaired upper gaze      | White count: 2/mm <sup>3</sup> (all monocytes)<br>Protein 62mg/dl<br>Glucose 50mg/dl, ***  | negative serologies, including the rRT-PCR for SARSCoV-2 | NA                                                                                             | Polyneuritis cranialis | None                                    | Improved              | Non-severe |                                                                   |
| Sedaghat K. et. al. / Iran      | 65/M | 10 Days | DM type 2                                                 | Quadriplegia / Bilateral facial palsies /areflexia, Reduced vibration and fine touch sensation | CSf analysis could not be performed due to lack of consent                                 | NA                                                       | Normal finding except for mild herniation of two intervertebral discs. (level is not reported) | AMSAN                  | IVIG x 5 days                           | Partial improvement   | Non-severe |                                                                   |
| Zhao H et. al. /China           | 61/F | 1 day   |                                                           | Areflexia, motor weakness, reduced sensation to touch and pin prick distally                   | CSF: WBC<5/mm <sup>3</sup> , glucose: **, ***<br>Protein: 124mg/dl                         | NA                                                       | NA                                                                                             | AIDP                   | IVIG (duration of therapy not reported) | Improved              | Non-severe |                                                                   |
| Virani, A. et. al. /USA         | 54/M | 8 days  |                                                           | Areflexia, decreased lower extremities followed by ascending paralysis, difficulty breathing   | NA                                                                                         | NA                                                       | Thoracic and Spine MRI was normal                                                              | AIDP                   | IVIG x 5 days                           | Partially improvement | Severe     |                                                                   |
| Alberti P et. al. /Italy        | 71/M | 3 days  | HTN, Abdominal aortic aneurysm, lung cancer s/p resection | Tetraparesis, Areflexia, hyposthesia at distal limbs, dyspnea, low back pain                   | CSF: WBC: 9 /mm <sup>3</sup> unspecified cell type.<br>Protein 54mg/dl<br>Glucose: **, *** | NA                                                       | NA                                                                                             | AIDP                   | IVIG x 5 days                           | Deceased              | Severe     |                                                                   |

|                                |      |         |                     |                                                                                                                                |                                                                               |                                              |                                  |       |                   |                       |             |
|--------------------------------|------|---------|---------------------|--------------------------------------------------------------------------------------------------------------------------------|-------------------------------------------------------------------------------|----------------------------------------------|----------------------------------|-------|-------------------|-----------------------|-------------|
| Padroni, M. et. al. / Italy    | 70/M | 24 Days | NA                  | Asthenia, hand and feet. Gait difficulty, Areflexia                                                                            | WBC <5 /mm <sup>3</sup><br>Protein: 48mg/dl<br>Glucose: **, ***               | NA                                           | NA                               | AIDP  | IVIG x 5 days     | Poor outcome          | Severe      |
| Coen M. et. al. / Switzerland  | 70/M | 6 days  | None                | Bilateral lower limb paralysis, Areflexia                                                                                      | CSF: WBC<5/mm <sup>3</sup><br>Protein levels not reported<br>Glucose: **, *** | antiganglioside antibodies were not detected | No reported lesions on MRI brain | AIDP  | IVIG x 5 days     | Partially improvement | Non-severe  |
| Mozhdehipanah H. et. al. /Iran | 38/M | 21 days | NHTN                | bilateral facial paralysis and mildly dysarthric speech, areflexia, decreased sensation to all modalities in distal four limbs | WBC: <5mm <sup>3</sup><br>Protein: 139mg/dl<br>Glucose: **, ***               | NA                                           | NA                               | AIDP  | PLEX x 5 sessions | Improved              | Non-severe  |
| Mozhdehipanah H. et. al. /Iran | 55/F | 26 days | COPD                | Acute progressive lower limb weakness, Areflexia, decreased pinprick, vibration in distal limbs                                | WBC: <5mm <sup>3</sup><br>Protein: 57mg/dl<br>Glucose: reported normal; ***   | Brain MRI reported as Normal                 | NA                               | AMSAN | IVIG x 5 days     | Deceased              | severe      |
| Mozhdehipanah H. et. al. /Iran | 66/F | 30 days | DM type 2, HTN, RA. | Areflexia, decreased weakness in lower extremities, decreased sensation to light touch, position, vibration                    | WBC<5mm <sup>3</sup><br>Protein: 89mg/dl<br>Glucose: reported normal, ***     | NA                                           | NA                               | AIDP  | IVIG x 5 days     | Partial improvement   | Non- Severe |

|                                     |      |         |      |                                                                                                    |                                                                                            |                                               |                                                                                                                                   |      |                                     |                       |            |
|-------------------------------------|------|---------|------|----------------------------------------------------------------------------------------------------|--------------------------------------------------------------------------------------------|-----------------------------------------------|-----------------------------------------------------------------------------------------------------------------------------------|------|-------------------------------------|-----------------------|------------|
| Tiet M.Y. et. al.<br>/UK            | 49/M | 21 days | None | Limb paresthesia, ascending limb weakness, facial diplegia,                                        | WBC: <5mm <sup>3</sup><br>Protein: 125mg/dl<br>SARS-CoV-2 PCR: neg                         | NA                                            | NA                                                                                                                                | AIDP | IVIG x 5 days                       | Improved              | Severe     |
| Embrahimzadeh, AS et. al.<br>/Iran  | 46/M | 18 days | None | peripheral facial nerve palsy on the right side, flaccid paralysis                                 | WBC<5mm <sup>3</sup><br>Protein: 78mg/dl,<br>glucose 70mg/dl, ***                          | Gq1b antibody: non-reactive                   | NA                                                                                                                                | AIDP | No treatment                        | Improved              | Non-severe |
| Embrahimzadeh, AS. et. al.<br>/Iran | 65/M | 10 days | None | Areflexia, lower extremity weakness                                                                | NA                                                                                         | Gq1b antibody: non-reactive                   | NA                                                                                                                                | AIDP | IVIG x 1 course                     | Improved              | Non-severe |
| Chan M et. al.<br>/USA              | 68/M | 18 days | None | bilateral facial weakness, dysphagia, dysarthria, neck flexion weakness, and inability to ambulate | WBC:<5mm <sup>3</sup><br>Protein: 226mg/dl<br>Glucose: 56mg/dl; ***<br>SARS-CoV-2 PCR: neg | ganglioside antibody testing was unremarkable | MRI of lumbosacral spine was unremarkable                                                                                         | AIDP | PLEX x 5 sessions                   | Improved              | Non-severe |
| Chan M. et. al.<br>/USA             | 84/M | 23 days | None | Proximal upper and lower limb weakness and diminished vibration and proprioception at the toes     | WBC< 5/mm <sup>3</sup><br>Protein: 67mg/dl<br>Glucose: 58mg/dl: ***<br>SARS-CoV-2 PCR: neg | elevated GM2 IgG/IgM antibodies               | NA                                                                                                                                | AIDP | PLEX x 5 sessions, followed by IVIG | Partially improvement | Severe     |
| Bigaut K. et. al.<br>/France        | 43/M | 21 days | None | Decreased sensation, flaccid paralysis in lower limbs                                              | WBC<5/mm <sup>3</sup><br>Protein: 94mg/dl<br>Glucose: **, ***<br>PCR for Covid-19: neg     | Antiganglioside antibodies were negative      | multiple cranial neuritis (in nerves III, V, VI, VII, and VIII), radiculitis, and plexitis on both the brachial and lumbar plexus | AIDP | IVIG x 5 days                       | Improved              | Non-severe |



|                               |      |         |      |                                                                                                                  |                                                                                       |                                                                      |                                                                                                                       |      |                                                              |                     |            |
|-------------------------------|------|---------|------|------------------------------------------------------------------------------------------------------------------|---------------------------------------------------------------------------------------|----------------------------------------------------------------------|-----------------------------------------------------------------------------------------------------------------------|------|--------------------------------------------------------------|---------------------|------------|
| Bigaut, K. et. al./France     | 70/F | 10 days | None | Flaccid tetra paresis, generalized areflexia, forelimb paresis; respiratory failure                              | WBC<5/mm <sup>3</sup><br>Protein: 160mg/dl<br>Glucose: **, ***                        | Negative                                                             | NA                                                                                                                    | AIDP | IVIG x 5 days                                                | Improved            | Non-severe |
| Chan JL et. al./Canada        | 58/M | 20 days | NA   | facial diplegia and areflexia in the lower extremities                                                           | WBC<5/mm <sup>3</sup><br>Protein: 100mg/dl<br>Glucose: **, ***<br>SARS-CoV-2 PCR: neg | NA                                                                   | Bilateral intracranial and extracranial facial nerve enhancement                                                      | AIDP | IVIG x 5 days                                                | Partial Improvement | Non-severe |
| Helbok, R et. al. / Austria   | 68/M | 10 days | None | Decreased sensation to touch and pinprick in the lower extremities, absent ankle jerk, and inability to walk     | WBC <5/mm <sup>3</sup><br>Protein: 64mg/dl<br>Glucose: **, ***                        | Antiganglioside antibodies                                           | MRI Lumbar unremarkable findings                                                                                      | AIDP | Started with IVIG but switched to PLEX next day x 4 sessions | Partial improvement | Severe     |
| Kilinc D et. al. /Netherlands | 50/M | 26 days | None | Facial diplegia, mild symmetric proximal muscle weakness.                                                        | WBC < 5mm <sup>3</sup><br>Protein: Normal<br>Glucose: **, ***<br>SARS-CoV-2 PCR: neg  | Anti-GQ1b was negative.                                              | MRI brain Normal                                                                                                      | AIDP | IVIG x 5 days                                                | Partial improvement | Non-severe |
| Lantos J.E. et. al. /USA      | 36/M | 2 days  | None | Ophthalmoparesis (including initial left CN III and eventual bilateral CN VI palsies), ataxia, and hyporeflexia. | NA                                                                                    | Asialo GM1 ganglioside antibody: equivocal<br>Anti-GQ1b was negative | MRI Orbit: striking enlargement, prominent enhancement, and T2 hyperintense signal of the left cranial nerve (CN) III | MFS  | IVIG (duration not reported)                                 | Partial improvement | Non-severe |

|                                   |      |         |           |                                                                                                                                       |                                                                                    |                                           |                                                                   |      |               |                     |            |
|-----------------------------------|------|---------|-----------|---------------------------------------------------------------------------------------------------------------------------------------|------------------------------------------------------------------------------------|-------------------------------------------|-------------------------------------------------------------------|------|---------------|---------------------|------------|
|                                   |      |         |           | Paresthesia in bi-lateral legs.                                                                                                       |                                                                                    |                                           |                                                                   |      |               |                     |            |
| Lascano A.M. et. al. /Switzerland | 52/F | 15 days | None      | Back pain, limb weakness, ataxia, distal paresthesia, dysgeusia, respiratory failure, dysautonomia and tetraplegia with areflexia     | WBC 3 cell/ $\mu$ l; Protein level 60 mg/dl; Glucose: **, ***                      | Anti-ganglioside antibodies were negative | MRI spinal cord: Unremarkable                                     | AIDP | IVIg x 5 days | Improved            | Non-sever  |
| Lascano A.M. et. al. /Switzerland | 63/F | 7 days  | DM type 2 | Lower limb pain, mild weakness and normal deep tendon reflexes. Developed tetraparesis, distal paresthesia and areflexia              | WBC 2 cell/ $\mu$ l; Protein level 40 mg/dl; Glucose: **, *** )                    | NA                                        | NA                                                                | AIDP | IVIg x 5 days | Partial improvement | Non-severe |
| Lascano A.M. et. al. /Switzerland | 61/F | 22 days | None      | Lower limb weakness and distal paresthesia, dizziness, dysphagia, dysautonomia, areflexia. Presented worsening of bulbar symptoms and | WBC 4 cell/ $\mu$ l; Protein level 140 mg/dl; Glucose: **, *** SARS-CoV-2 PCR: neg | NA                                        | Spinal cord: Lum-bosacral nerve root enhancement<br>Brain: Normal | AIDP | IVIg x 5 days | Partial improvement | Non-severe |

|                                   |      |         |                             |                                                                                                                                                                                                                      |                                                                |                                                                              |                                                                                   |      |               |                     |            |  |
|-----------------------------------|------|---------|-----------------------------|----------------------------------------------------------------------------------------------------------------------------------------------------------------------------------------------------------------------|----------------------------------------------------------------|------------------------------------------------------------------------------|-----------------------------------------------------------------------------------|------|---------------|---------------------|------------|--|
|                                   |      |         |                             | bilateral facial palsy                                                                                                                                                                                               |                                                                |                                                                              |                                                                                   |      |               |                     |            |  |
| Reyes-Bueno A. et. al. / Spain    | 51/F | 15 days | None                        | Paresis of the left external rectus muscle with horizontal diplopia when looking to the left, discrete predominantly inferior bilateral facial paresis, symmetrical paraparesis in leg muscles and global areflexia. | WBC<5/mm <sup>3</sup><br>Protein: 70mg/dl<br>Glucose: **, ***  | Antiganglioside antibodies: negative                                         | Unremarkable                                                                      | MFS  | IVIG x 5 days | Partial improvement | Non-severe |  |
| Sancho- Saldaña A. et. al. /Spain | 56/F | 15 days | None                        | Bilateral facial nerve palsy, dysphagia and severe proximal tetraparesis with global areflexia                                                                                                                       | WBC<5/mm <sup>3</sup><br>Protein: 86mg/dl<br>Glucose: **, ***  | Antiganglioside antibodies: Negative                                         | MRI of whole spine: brainstem and cervical meningeal enhancement (up to C7 level) | AIDP | IVIG x 5 days | Partial improvement | Severe     |  |
| Agosti E. et. al. / Italy         | 68/M | 10 Days | Dyslipidemia, AAA, BPH, HTN | Facial diplegia, Paraplegia and bilateral ankle areflexia                                                                                                                                                            | WBC<5/mm <sup>3</sup><br>Protein: 98mg/dl<br>Glucose: **, ***  | NA                                                                           | NA                                                                                | AIDP | IVIG x 5 days | Improved            | Non-severe |  |
| Lampe A. et. al. / Germany        | 65/M | 3 days  | None                        | Paresis of right arm and paresis of lower limbs, hyporeflexia,                                                                                                                                                       | WBC: <5mm <sup>3</sup><br>Protein: 56mg/dl<br>Glucose: **, *** | ganglioside antibodies (GM1, GM2, GM3, GD1a, GD1b, GT1b, GQ1b) were negative | NA                                                                                | AIDP | IVIG x 5 days | Improved            | Non-severe |  |

|                              |       |         |      |                                                                                                                                                           |                                                                                   |                                                                                       |                                                                                                                                                                                                                                                                                                                            |                             |                     |          |            |
|------------------------------|-------|---------|------|-----------------------------------------------------------------------------------------------------------------------------------------------------------|-----------------------------------------------------------------------------------|---------------------------------------------------------------------------------------|----------------------------------------------------------------------------------------------------------------------------------------------------------------------------------------------------------------------------------------------------------------------------------------------------------------------------|-----------------------------|---------------------|----------|------------|
| Manganotti P et. al. / Italy | 50/F  | 16 days | None | Ataxia, ophthalmoplegia with diplopia in vertical and lateral gaze, left upper arm cerebellar dysmetria, generalized areflexia, mild lower facial defects | WBC <5mm <sup>3</sup><br>Protein 74.9mg/dl<br>Glucose: **, ***                    | anti-GM1, anti-GM2, anti-GM3, anti-GD1a, anti-GD1b, anti-GT1b, and anti-GQ1b negative | No abnormalities on MRI brain                                                                                                                                                                                                                                                                                              | MFS                         | IVIG x 5days        | Improved | Non-severe |
| Guilmot A. et. al. /Belgium  | 37/NA | 10 days | NA   | Unilateral facial nerve palsy, hemifacial paresis, bilateral hearing loss and paresthesia in lower limbs.                                                 | WBC: 101/mm <sup>3</sup> (95% lymphocytes)<br>Protein 51mg/dl<br>Glucose: **, *** | Anti-GD1b IgG titer: > 1/100                                                          | Thickened and abnormally hyperintense III cranial nerves enhancement, abnormal bilateral enhancement of cranial nerve V and abnormal bilateral enhancement of VI and VII. Lumbar spinal cord showed abnormal periconal enhancement of the pia-mater together with clumping and enhancement of the roots of the horse tail. | Facial palsy                | IVMP, 64mg x 7 days | Improved | Non-sever  |
| Guilmot A. et. al. /Belgium  | 40/NA | 5 days  | NA   | Partial left oculomotor nerve III palsy                                                                                                                   | WBC<5mm <sup>3</sup><br>Protein: 36mg/dl<br>Glucose: **, ***                      | NA                                                                                    | MRI brain was normal                                                                                                                                                                                                                                                                                                       | 3 <sup>rd</sup> nerve palsy | No treatment        | Improved | Non-severe |

|                                     |      |         |                                             |                                                                                                                         |                                                                                               |                                                                                                                |                               |                                       |                                                 |          |            |
|-------------------------------------|------|---------|---------------------------------------------|-------------------------------------------------------------------------------------------------------------------------|-----------------------------------------------------------------------------------------------|----------------------------------------------------------------------------------------------------------------|-------------------------------|---------------------------------------|-------------------------------------------------|----------|------------|
| Christiana Franke et. al. / Germany | 67/M | NA      | NA                                          | Oculomotor disturbance                                                                                                  | WBC<5mm <sup>3</sup><br>Protein: 336mg/dl<br>Glucose: 113mg/dl; ***                           | Oligoclonal bands were positive in csf and serum                                                               | NA                            | 3 <sup>rd</sup> nerve palsy           | NA                                              | NA       | NA         |
| Diez-Porras L et. al. / Spain       | 54/M | 5 Days  | HTN, Obesity                                | Asymmetric paresis in both upper limbs, hypoesthesia both hands, global areflexia, bilateral facial palsy and dysphagia | WBC: <5mm <sup>3</sup><br>Protein: 52mg/dl<br>Glucose: **, ***                                | Antiganglioside antibodies were measured in serum, obtaining IgM for GM2 and GD3 and a weak IgG band for GT1b. | NA                            | AIDP                                  | IVIG however developed reaction and was stopped | Improved | Severe     |
| Senel M. et. al. /Germany           | 61/M | 15 days | NA                                          | Ataxia, ophthalmoplegia, and general areflexia, Paresthesia on fingertips                                               | WBC<5mm <sup>3</sup><br>Protein: 1588mg/dl<br>glucose quotient was within normal range (0.51) | Anti-ganglioside antibody, Anti GQ1b: Negative                                                                 | NA                            | MFS                                   | IVIG x 5 days                                   | Improved | Non-severe |
| Khaja M. et. al. /USA               | 44/M | 3 days  | HTN, Asthma                                 | Facial diplegia                                                                                                         | WBC: <5mm <sup>3</sup><br>Protein: 92 mg/dl<br>Glucose: 77mg/dl; ***                          | IgG antibodies to GQ1B was negative                                                                            | MRI brain and C spine: normal | Bilateral facial nerve palsy and AIDP | IVIG x 5 days                                   | Improved | Non-severe |
| Abbaslou M.A. et. al. / Iran        | 55/F | 26 days | Unknown chronic lung disease                | Paresis in bilateral lower limbs, paresthesia in lower limbs, Areflexia                                                 | WBC: <5mm <sup>3</sup><br>Protein: 48.4mg/dl<br>Glucose: 78mg/dl; ***                         | NA                                                                                                             | NA                            | AMSAN                                 | IVIG                                            | Deceased | Severe     |
| Defabio A.C et. al. / USA           | 70/F | 90 days | Reflex sympathetic dystrophy, fibromyalgia, | Paresis in lower limbs, paresthesia in distal lower limbs,                                                              | WBC: 8/mm <sup>3</sup><br>Protein: 127mg/dl<br>Glucose 79mg/dl; ***                           | NA                                                                                                             | NA                            | AIDP                                  | IVIG x 5 days                                   | Improved | Non-severe |

|                            |      |         |                              |                                                                                                       |                                                                                             |                                                                      |                                                                                             |       |                |          |            |  |
|----------------------------|------|---------|------------------------------|-------------------------------------------------------------------------------------------------------|---------------------------------------------------------------------------------------------|----------------------------------------------------------------------|---------------------------------------------------------------------------------------------|-------|----------------|----------|------------|--|
|                            |      |         |                              | GERD, hiatal hernia, asthma                                                                           | Areflexia in both lower limbs.                                                              |                                                                      |                                                                                             |       |                |          |            |  |
| Nanda S et. al. / India    | 55/F | 10 days | DM, HTN, Cholelithiasis      | Paresis in all four limbs, areflexia                                                                  | WBC: 5 cells, all lymphocytes<br>Protein: 54mg/dl<br>Glucose: 114mg/d; ***                  | NA                                                                   | MRI of spine De-generative changes in spine<br>No Cord changes<br>No nerve root enhancement | AMAN  | IVIG x 5 days  | Improved | Non-severe |  |
| Nanda S et. al. / India    | 72/M | 6 days  | HTN                          | Generalized hypotonia, paresis in both lower limbs, Areflexia                                         | WBC: 0<br>Protein: 74mg/dl<br>Glucose:110mg/dl; ***                                         | NA                                                                   | MRI of spine Mild degenerative changes, no cord changes, no nerve root enhancement          | AIDP  | IVIG x 5 days  | Deceased | Severe     |  |
| Nanda S et. al. / India    | 55/M | 5 days  | DM, HTN, CKD on hemodialysis | Generalized hypotonia, Paresis in both lower limbs, and areflexia s, glove and stocking sensory loss, | WBC: 5 cells, all lymphocytes<br>Protein: 84mg/dl<br>Glucose:94mg/dl; ***                   | NA                                                                   | MRI of spine mild degenerative changes, no cord changes, no contrast enhancement            | AMSAN | IVIG x 5 days  | Improved | Non-severe |  |
| Nanda S. et. al. / India   | 49/M | 10days  | HTN                          | Bilateral facial palsy, Paresis in both lower limbs, Areflexia in both lower limbs                    | WBC<5mm <sup>3</sup><br>Protein: 52mg/dl<br>Glucose:54mg/dl; ***                            | NA                                                                   | MRI of spine mild degenerative changes                                                      | AIDP  | IVIG x 5 days  | Improved | Non-severe |  |
| Gigli G.L. et. al. / Italy | 53/M | 55 days | None                         | Lower limb paresthesia and paraparesis with ataxia, areflexia                                         | WBC<5mm <sup>3</sup><br>Protein: 193mg/dl<br>Glucose: **, ***<br>SAR-CoV-2 CSF IgG, IgM pos | GM1, GM2, GM3, GM4, GD1a, GD1b, GD2, GD3, GT1a, GT1b, GQ1b) negative | Mri brain Unremarkable                                                                      | AIDP  | IVIG x 1 cycle | Improved | Non-severe |  |
| Zito, A. et. al. / Italy   | 57/M | 17 days | NA                           | Paresis of lower limbs, loss of touch and                                                             | WBC<5mm <sup>3</sup><br>Protein: normal, no oligoclonal bands                               | Anti-GM1, anti-GD1b, and anti-GQ1b IgG                               | NA                                                                                          | AMSAN | IVIG x 5 days  | Improved | Non-severe |  |

|                            |      |         |                                                                          |                                                                                            |                                                               |                                        |                                                                                                                                                                                                       |                                             |               |                     |            |  |
|----------------------------|------|---------|--------------------------------------------------------------------------|--------------------------------------------------------------------------------------------|---------------------------------------------------------------|----------------------------------------|-------------------------------------------------------------------------------------------------------------------------------------------------------------------------------------------------------|---------------------------------------------|---------------|---------------------|------------|--|
|                            |      |         |                                                                          | vibration in feet and ankles, gait ataxia, ankle areflexia and hyporeflexia in other limbs | Glucose: **, ***                                              | and IgM were negative                  |                                                                                                                                                                                                       |                                             |               |                     |            |  |
| Korem S. et. al. /USA      | 58/F | 14 days | Anterior Cervical discectomy and anterior interbody arthrodesis at C3-C7 | Paresthesia, Bilateral lower extremity paresis, ataxia, hyporeflexia                       | WBC<5mm <sup>3</sup><br>Protein: 117mg/dl<br>Glucose: **, *** | NA                                     | MRI lumbar spine without contrast showed moderate bilateral and moderate left-sided neural foraminal narrowing at L2–L3 and L3–L4, respectively, and unremarkable conus medullaris. MRI Brain: Normal | GBS/ Subtype unspecified, NCS not performed | IVIG x 4 days | Improved            | Non-severe |  |
| Garnero M. et. al./ Italy  | 65/M | NA      | NA                                                                       | NA                                                                                         | WBC<5mm <sup>3</sup><br>Protein: NA<br>Glucose:               | Anti-gangliosides antibodies: Negative | NA                                                                                                                                                                                                    | AIDP                                        | IVIG          | Improved            | Non-severe |  |
| Garnero, M. et. al./ Italy | 73/M | 0 days  | NA                                                                       | NA                                                                                         | WBC<5mm <sup>3</sup><br>Protein: 60mg/dl<br>Glucose:          | Anti-gangliosides antibodies; Negative | NA                                                                                                                                                                                                    | AIDP                                        | IVIG          | Improved            | Non-severe |  |
| Garnero, M. et. al./ Italy | 55/M | 20 days | NA                                                                       | NA                                                                                         | WBC<5mm <sup>3</sup><br>Protein: 30mg/dl<br>Glucose:          | Anti-gangliosides antibodies: negative | NA                                                                                                                                                                                                    | MFS                                         | IVIG          | Improved            | Non-Severe |  |
| Garnero, M. et. al./ Italy | 46/F | 3 days  | NA                                                                       | NA                                                                                         | WBC<5mm <sup>3</sup><br>Protein: 100 g/dl<br>Glucose:         | Anti-gangliosides antibodies: Negative | NA                                                                                                                                                                                                    | AIDP                                        | IVIG          | Partial improvement | Severe     |  |
| Garnero, M. et. al./ Italy | 60/M | 20 days | NA                                                                       | NA                                                                                         | WBC<5mm <sup>3</sup><br>Protein: 20mg/dl<br>Glucose:          | Anti-gangliosides antibodies: negative | NA                                                                                                                                                                                                    | AMSAN                                       | IVIG          | Partial Improvement | Severe     |  |

|                             |      |         |                     |                                                                                                                          |                                                                                                 |                                                                                     |                                                                                                                                                                |                             |                                                             |                     |            |
|-----------------------------|------|---------|---------------------|--------------------------------------------------------------------------------------------------------------------------|-------------------------------------------------------------------------------------------------|-------------------------------------------------------------------------------------|----------------------------------------------------------------------------------------------------------------------------------------------------------------|-----------------------------|-------------------------------------------------------------|---------------------|------------|
| Garnero, M. et. al./ Italy  | 63/F | 15 days | NA                  | NA                                                                                                                       | WBC<5mm <sup>3</sup><br>Protein: 90mg/dl<br>Glucose:                                            | Anti-gangliosides antibodies: Negative                                              | NA                                                                                                                                                             | AMSAN                       | IVIG                                                        | Partial Improvement | Severe     |
| Masuccio F.G et. al. /Italy | 70/F | 15 days | Obesity, HTN        | Tetraparesis, paresthesia in both lower limbs with urinary retention and perineal areflexia, hyperreflexia in all limbs. | WBC<5mm <sup>3</sup><br>Protein: Normal,<br>Oligoclonal band mirror pattern<br>Glucose: **, *** | Anti-GD1b IgM: positive                                                             | MRI brain normal. MRI spine showed hyperintensity in the posterior portion of the spinal cord and encompassed two vertebral levels (C7-T1), and non-enhancing. | AMAN                        | PLEX followed by IVIG.                                      | Partial improvement | Non-severe |
| Galán, A.V et. al. / Spain  | 43/M | 10 days | NA                  | Symmetric paresis and paresthesia in all four limbs, global areflexia, bilateral facial palsy, dysphagia                 | NA                                                                                              | NA                                                                                  | NA                                                                                                                                                             | AIDP                        | IVIG x 5 days                                               | Partial improvement | Non-severe |
| Pelea T et. al. /Germany    | 56/F | 19 days | HTN, Hypothyroidism | Tetraparesis, Areflexia, reduced vibration in bilateral stocking pattern                                                 | WBC: 9/mm <sup>3</sup><br>Protein: 575mg/dl<br>Glucose:67.3;104mg/dl                            | Anti-ganglioside antibodies (GM1-, GQ1b-antibodies) were absent                     | MRI of spine was normal                                                                                                                                        | GBS/AMAN                    | PLEX x 7 sessions followed by IVIG x 5 days                 | Partial improvement | Severe     |
| Kopscik M.R. et. al. /USA   | 31/M | Unclear | None                | CN VI-VII and XII palsies, dysmetria, Gait ataxia, patellar and achilles areflexia.                                      | WBC<5mm <sup>3</sup><br>Protein: Normal<br>Glucose: **, ***                                     | Presence of anti-ganglioside – GQ1b (Anti-GQ1b) immunoglobulin G antibodies (1:100) | MRI brain and lumbar spine Normal                                                                                                                              | GBS/MFS                     | PLEX followed by IVIG (duration of therapy is not reported) | Partial improvement | Non-severe |
| Wada S. et. al. /Japan      | 69/M | 17 Days | DM                  | Hyporeflexia, paralytic ileus, Areflexia,                                                                                | WBC<5/mm <sup>3</sup><br>Protein: 202mg/dl<br>Glucose: **, ***                                  | NA                                                                                  | NA                                                                                                                                                             | GBS (variant not specified) | IVIG x 5 days                                               | Improved            | Severe     |



|                                |      |         |                               |                                                                                                               |                                                                      |                                                                                                                          |                                                                                                                                                                                 |                             |                       |                     |            |  |
|--------------------------------|------|---------|-------------------------------|---------------------------------------------------------------------------------------------------------------|----------------------------------------------------------------------|--------------------------------------------------------------------------------------------------------------------------|---------------------------------------------------------------------------------------------------------------------------------------------------------------------------------|-----------------------------|-----------------------|---------------------|------------|--|
|                                |      |         |                               | paresis of limbs                                                                                              |                                                                      |                                                                                                                          |                                                                                                                                                                                 |                             |                       |                     |            |  |
| Abrams R.M.C. et. al./USA      | 67/F | 10 days | Breast cancer                 | Progressive quadriparesis, Paresthesias, urinary retention, global areflexia, Left facial and bulbar weakness | WBC<5mm <sup>3</sup><br>Protein: 222mg/dl<br>Glucose:61mg/dl; ***    | Ganglioside, acetylcholine receptor, lyme, and HIV antibodies were negative                                              | MRI brain and spine unremarkable                                                                                                                                                | GBS (variant not specified) | PLEX x 2 sessions     | Partial improvement | Severe     |  |
| Hirayama T. et. al./Japan      | 54/F | 20 days | Asthma                        | Symmetric distal paresis, Paresthesia in all limbs, areflexia in lower limbs                                  | WBC<5mm <sup>3</sup><br>Protein: Reported Normal<br>Glucose: **, *** | Antiganglioside antibodies- GM1, GM2, GD1a, GD1b, GD3, Gal-NAc-GD1a, GT1a, GT1b, GQ1b and GA1 (asialo-GM1) were negative | NA                                                                                                                                                                              | GBS (variant not specified) | None                  | Improved            | Non-severe |  |
| Oguz-Akarsu E. et. al./ Turkey | 53/F | 3 days  | NA                            | Mild dysarthria, bilateral lower limb paresis and paresthesia, Areflexia in lower limbs                       | WBC<5mm <sup>3</sup><br>Protein: 32.6 mg/dl<br>Glucose: **, ***      | NA                                                                                                                       | MRI of the lumbar and cervical spines revealed asymmetrical thickening and hyperintensity of postganglionic roots supplying the brachial and lumbar plexuses in STIR sequences. | GBS/AIDP                    | None                  | Improved            | Non-severe |  |
| Homma Y. et. al. /Japan        | 35/F | 2 days  | NA                            | Facial paralysis, anosmia                                                                                     | WBC<5mm <sup>3</sup><br>Protein: 17mg/dl<br>Glucose:61mg/dl;***      | NA                                                                                                                       | NA                                                                                                                                                                              | Facial nerve palsy          | None                  | Improved            | Non-severe |  |
| Gogia B. et. al. / USA         | 58/M | 5 days  | COPD, HTN, CAD, Facial trauma | Decreased sensation in V1-V3 distribution (CN V), Left sided facial palsy                                     | NA                                                                   | NA                                                                                                                       | MRI brain Normal                                                                                                                                                                | NA                          | Valacyclovir x 7 days | Improved            | Non-severe |  |

|                                |      |         |                                                                                                                                          |                                                                                                                                      |                                                                       |                                               |                                                                                                                                                                    |                                          |                                        |                               |                 |
|--------------------------------|------|---------|------------------------------------------------------------------------------------------------------------------------------------------|--------------------------------------------------------------------------------------------------------------------------------------|-----------------------------------------------------------------------|-----------------------------------------------|--------------------------------------------------------------------------------------------------------------------------------------------------------------------|------------------------------------------|----------------------------------------|-------------------------------|-----------------|
| Looy E.V. et. al.<br>/ Belgium | 53/F |         | GBS x 2<br>times,<br>CIDP, (IVIG<br>every 6<br>weeks)                                                                                    | Paresthesia in all<br>limbs, areflexia<br>in ankle, gait<br>ataxia                                                                   | WBC<5mm <sup>3</sup><br>Protein: 100mg/dl<br>Glucose: 79mg/dl;<br>*** | NA                                            | NA                                                                                                                                                                 | GBS/ Exacer-<br>bation of<br>CIDP        | IVIG x 5<br>days                       | Partial im-<br>prove-<br>ment | Severe          |
| Bastug A. et. al./<br>Turkey   | 66/M | 5 days  | NA                                                                                                                                       | Paresis in lower<br>limbs, areflexia<br>in lower limbs,<br>bilateral hypoes-<br>thesia in lower<br>limbs                             | WBC: 0<br>Protein: 233.5mg/dl;<br>Glucose: **, ***                    | NA                                            | MRI brain normal                                                                                                                                                   | GBS (variant<br>not specified)           | IVIG, fol-<br>lowed by<br>PLEX         | Deceased                      | Severe          |
| Mostel Z. et. al.<br>/USA      | 69/F | 1 month | HTN, HLD,<br>Sickle cell<br>trait, iron de-<br>ficiency ane-<br>mia, stroke<br>(30 years ago<br>with residual<br>left sided<br>weakness) | Proximal weak-<br>ness in left upper<br>and lower limbs,<br>Left sided pares-<br>thesia in arms<br>and legs, are-<br>flexia in ankle | NA                                                                    | NA                                            | MRI of the brain<br>showed chronic mi-<br>crovascular is-<br>chemic<br>changes. MRI of the<br>spine revealed ab-<br>normal enhance-<br>ment in the cauda<br>equina | GBS/AIDP                                 | IVIG x 5<br>days                       | Improved                      | Severe          |
| Tekin A.B. et.<br>al./Turkey   | 34/F | 16 Days | Nulliparous,<br>37 <sup>th</sup> gesta-<br>tional week                                                                                   | Paresis in lower<br>limbs, right sided<br>facial paresis,<br>paresthesia in ex-<br>tremities, global<br>areflexia                    | WBC: 0<br>Protein: 62.34mg/dl<br>Glucose: normal; ***                 | NA                                            | NA                                                                                                                                                                 | GBS/AMSAN                                | IVIG x 5<br>days                       | Improved                      | Non-se-<br>vere |
| Boru U.T. et. al.<br>/ Turkey  | 35/M | 18 days | None                                                                                                                                     | Dysautonomia,<br>weakness in<br>lower limbs,<br>Hyporeflexia                                                                         | WBC<5mm <sup>3</sup><br>Protein: 50mg/dl<br>Glucose: **, ***          | NA                                            | NA                                                                                                                                                                 | GBS/ acute<br>motor axonal<br>neuropathy | None                                   | Improved                      | Non-se-<br>vere |
| Zubair, A.S. et.<br>al. /USA   | 32/M | 65 days | None                                                                                                                                     | Lower limb pare-<br>sis and                                                                                                          | WBC<5mm <sup>3</sup><br>Protein: 127.6mg/dl<br>Glucose: **, ***       | Negative for GM1<br>and GD1a/b anti-<br>bodie | NA                                                                                                                                                                 | GBS/<br>AMSAN                            | IVIG (dura-<br>tion not re-<br>ported) | Partial im-<br>prove-<br>ment | Non-se-<br>vere |

|                              |      |         |                                              |                                                                                        |                                                                                |                                             |                                              |                                                                                   |                              |                     |            |  |
|------------------------------|------|---------|----------------------------------------------|----------------------------------------------------------------------------------------|--------------------------------------------------------------------------------|---------------------------------------------|----------------------------------------------|-----------------------------------------------------------------------------------|------------------------------|---------------------|------------|--|
|                              |      |         |                                              | paresthesia, ankle areflexia                                                           |                                                                                |                                             |                                              |                                                                                   |                              |                     |            |  |
| Zubair, A.S. et. al. /USA    | 61/M | 60 days | DM, severe lumbar stenosis, right foot drop, | Mild proximal upper limb paresis, moderate lower limb paresis, ataxia, areflexia       | WBC<5mm <sup>3</sup><br>Protein: 54mg/dl<br>Glucose: **, ***                   | No ganglioside antibodies.                  | NA                                           | GBS/AMSAN                                                                         | IVIG (duration not reported) | Improved            | Non-severe |  |
| Aasfara J. et. al. /Morocco  | 36/F | 42 days | Pregnant 37 weeks gestation                  | Hyporeflexia in lower limbs, Grade 3 nystagmus with bilateral facial palsy             | WBC<5mm <sup>3</sup><br>Protein: 80mg/dl<br>Glucose: **, ***                   | Anti-ganglioside antibodies were negative   | Brain and spine MRI reported as normal       | GBS/AIDP<br>Bifacial weakness and paresthesia<br>Right vestibulocochlear neuritis | IVIG x 5 days                | Partial improvement | Non-severe |  |
| Mcdonnell E.P. et. al. / USA | 54/M | 3 days  | Type 2 DM,                                   | Facial diplegia, paresthesia and dysphagia, dysarthria, paraparesis, urinary retention | WBC<5mm <sup>3</sup><br>Protein: 74mg/dl<br>Glucose:69mg/dl;<br>Serum 109mg/dl | Anti GM1 ganglioside, IgM and IgG: negative | NA                                           | GBS (variant not specified)                                                       | IVIG x 5 days                | Improved            | Non-severe |  |
| Abolmaali M. et. al./Iran    | 88/F | 2 days  | HTN                                          | Neck flexion weakness, quadriplegia, areflexia in lower limbs                          | WBC<5mm <sup>3</sup><br>Protein: 88mg/dl<br>Glucose: **, ***                   | NA                                          | NA                                           | GBS/AMSAN                                                                         | PLEX x 6 sessions            | Partial improvement | Severe     |  |
| Abolmaali M. et. al. /Iran   | 47/M | 10 days | NA                                           | Dysarthria, generalized hyporeflexia, urinary retention, quadriplegia                  | WBC 0<br>Protein: 154mg/dl<br>Glucose: **, ***                                 | NA                                          | MRI brain and whole spine reported as normal | GBS/AMSAN                                                                         | PLEX x 2 session             | deceased            | Severe     |  |

|                               |      |         |          |                                                     |                                                |    |    |                                |                                                                           |          |                 |
|-------------------------------|------|---------|----------|-----------------------------------------------------|------------------------------------------------|----|----|--------------------------------|---------------------------------------------------------------------------|----------|-----------------|
| Abolmaali M.<br>et. al. /Iran | 58/M | 9 days  | NA       | Muscle weak-<br>ness, ataxia, are-<br>flexia        | WBC 0<br>Protein: 65 mg/dl<br>Glucose: **, *** | NA | NA | GBS/AMSAN                      | IVIG x 2<br>days then<br>switched to<br>PLEX due to<br>high Crea-<br>tine | deceased | Severe          |
| Bueso T. et. al./<br>USA      | 60/F | 22 days | Migraine | Bilateral lower<br>limbs paresis and<br>paresthesia | WBC 0<br>Protein: 197mg/dl<br>Glucose: **, *** | NA | NA | GBS (variant<br>not specified) | IVIG x 5<br>days                                                          | Improved | Non-se-<br>vere |
